# Supplementary material for: The expression and significance of AKR1B10 in laryngeal squamous cell carcinoma
Source: PubMed Central journal article supplement (PMC8440551; doi:10.1038/s41598-021-97648-y), 2021-09-14
Supplement: 41598_2021_97648_MOESM1_ESM.pdf [file 41598_2021_97648_MOESM1_ESM.pdf]

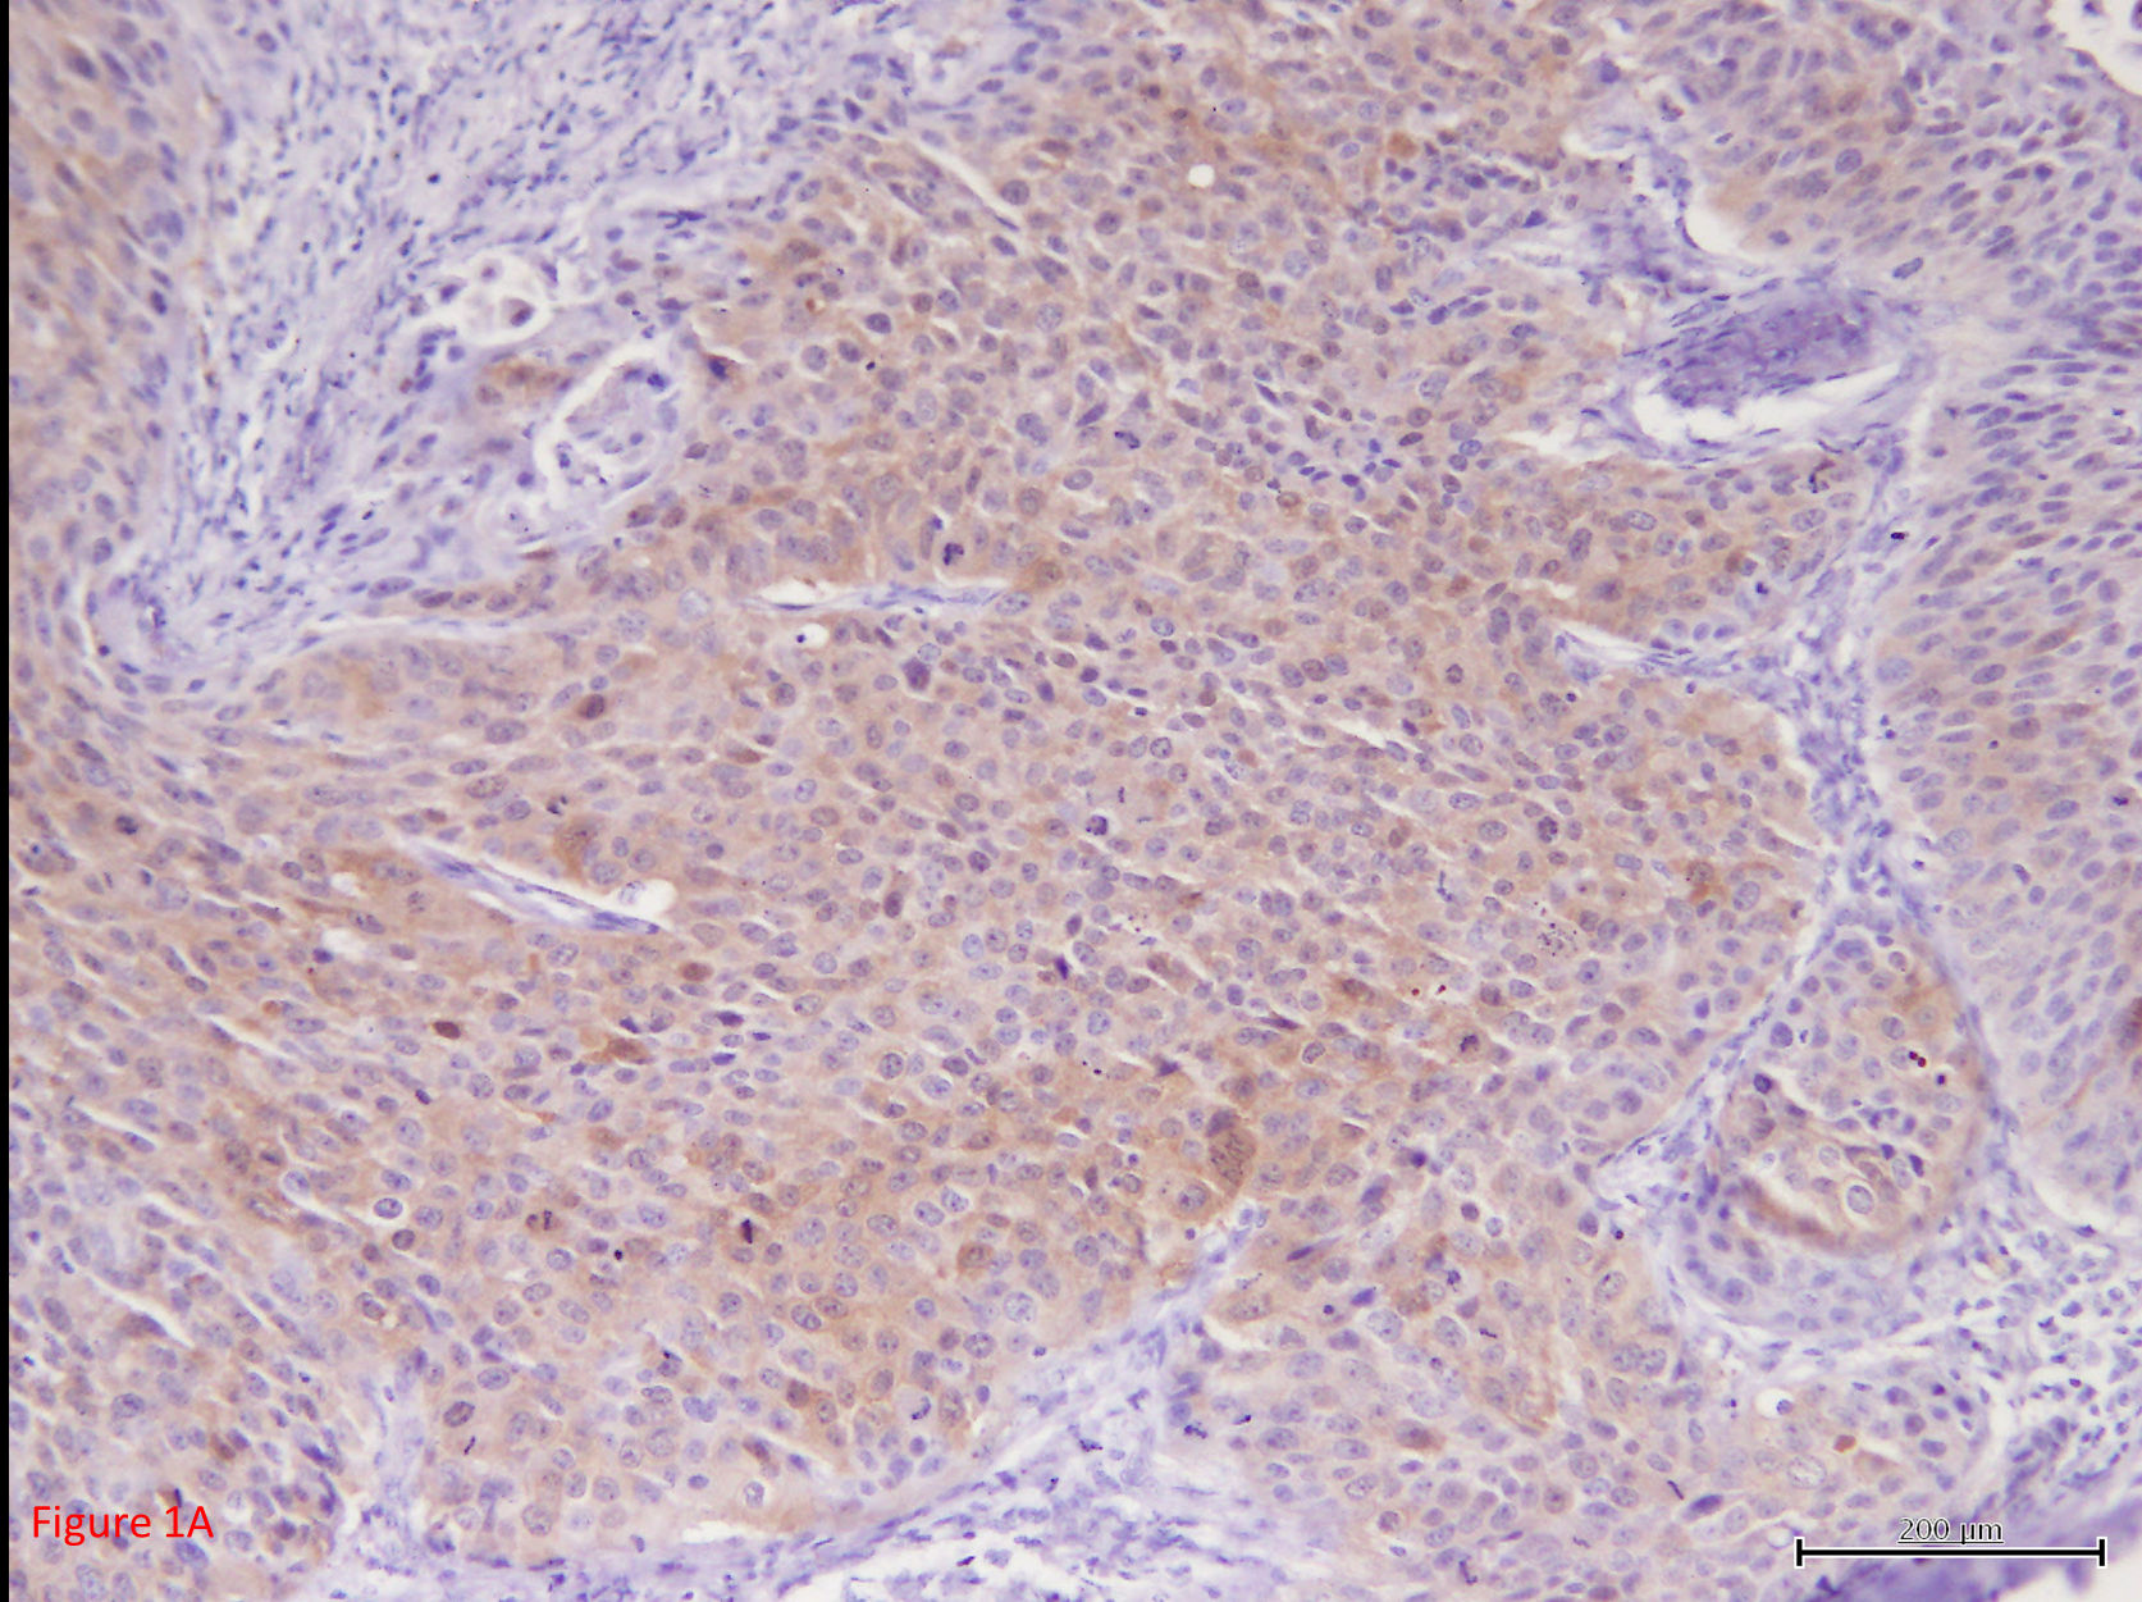

Figure 1A

200  $\mu$ m

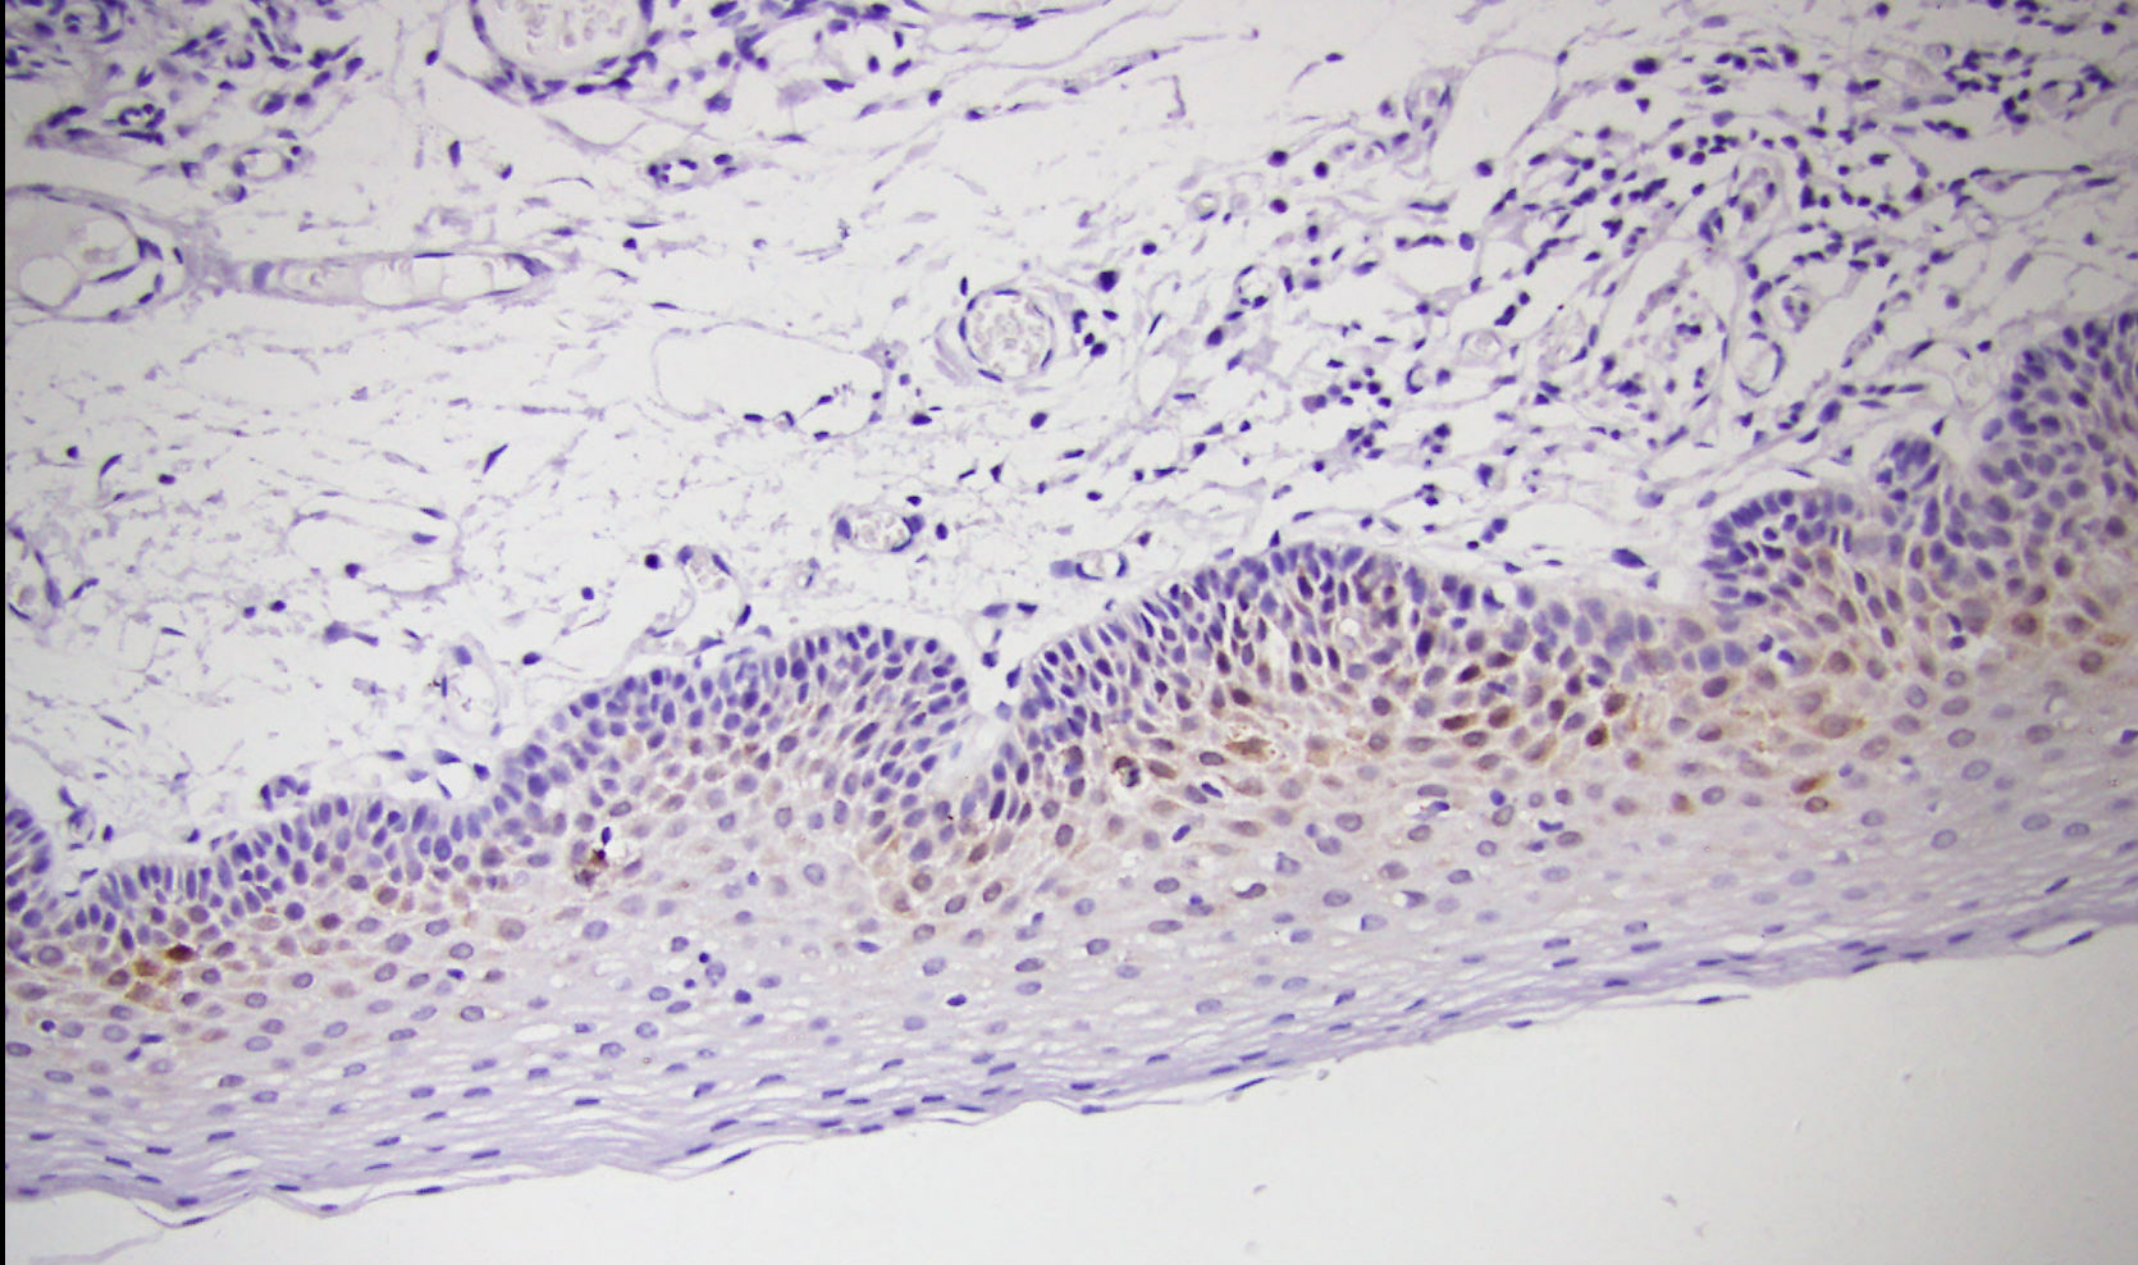

Figure 1B

200  $\mu$ m

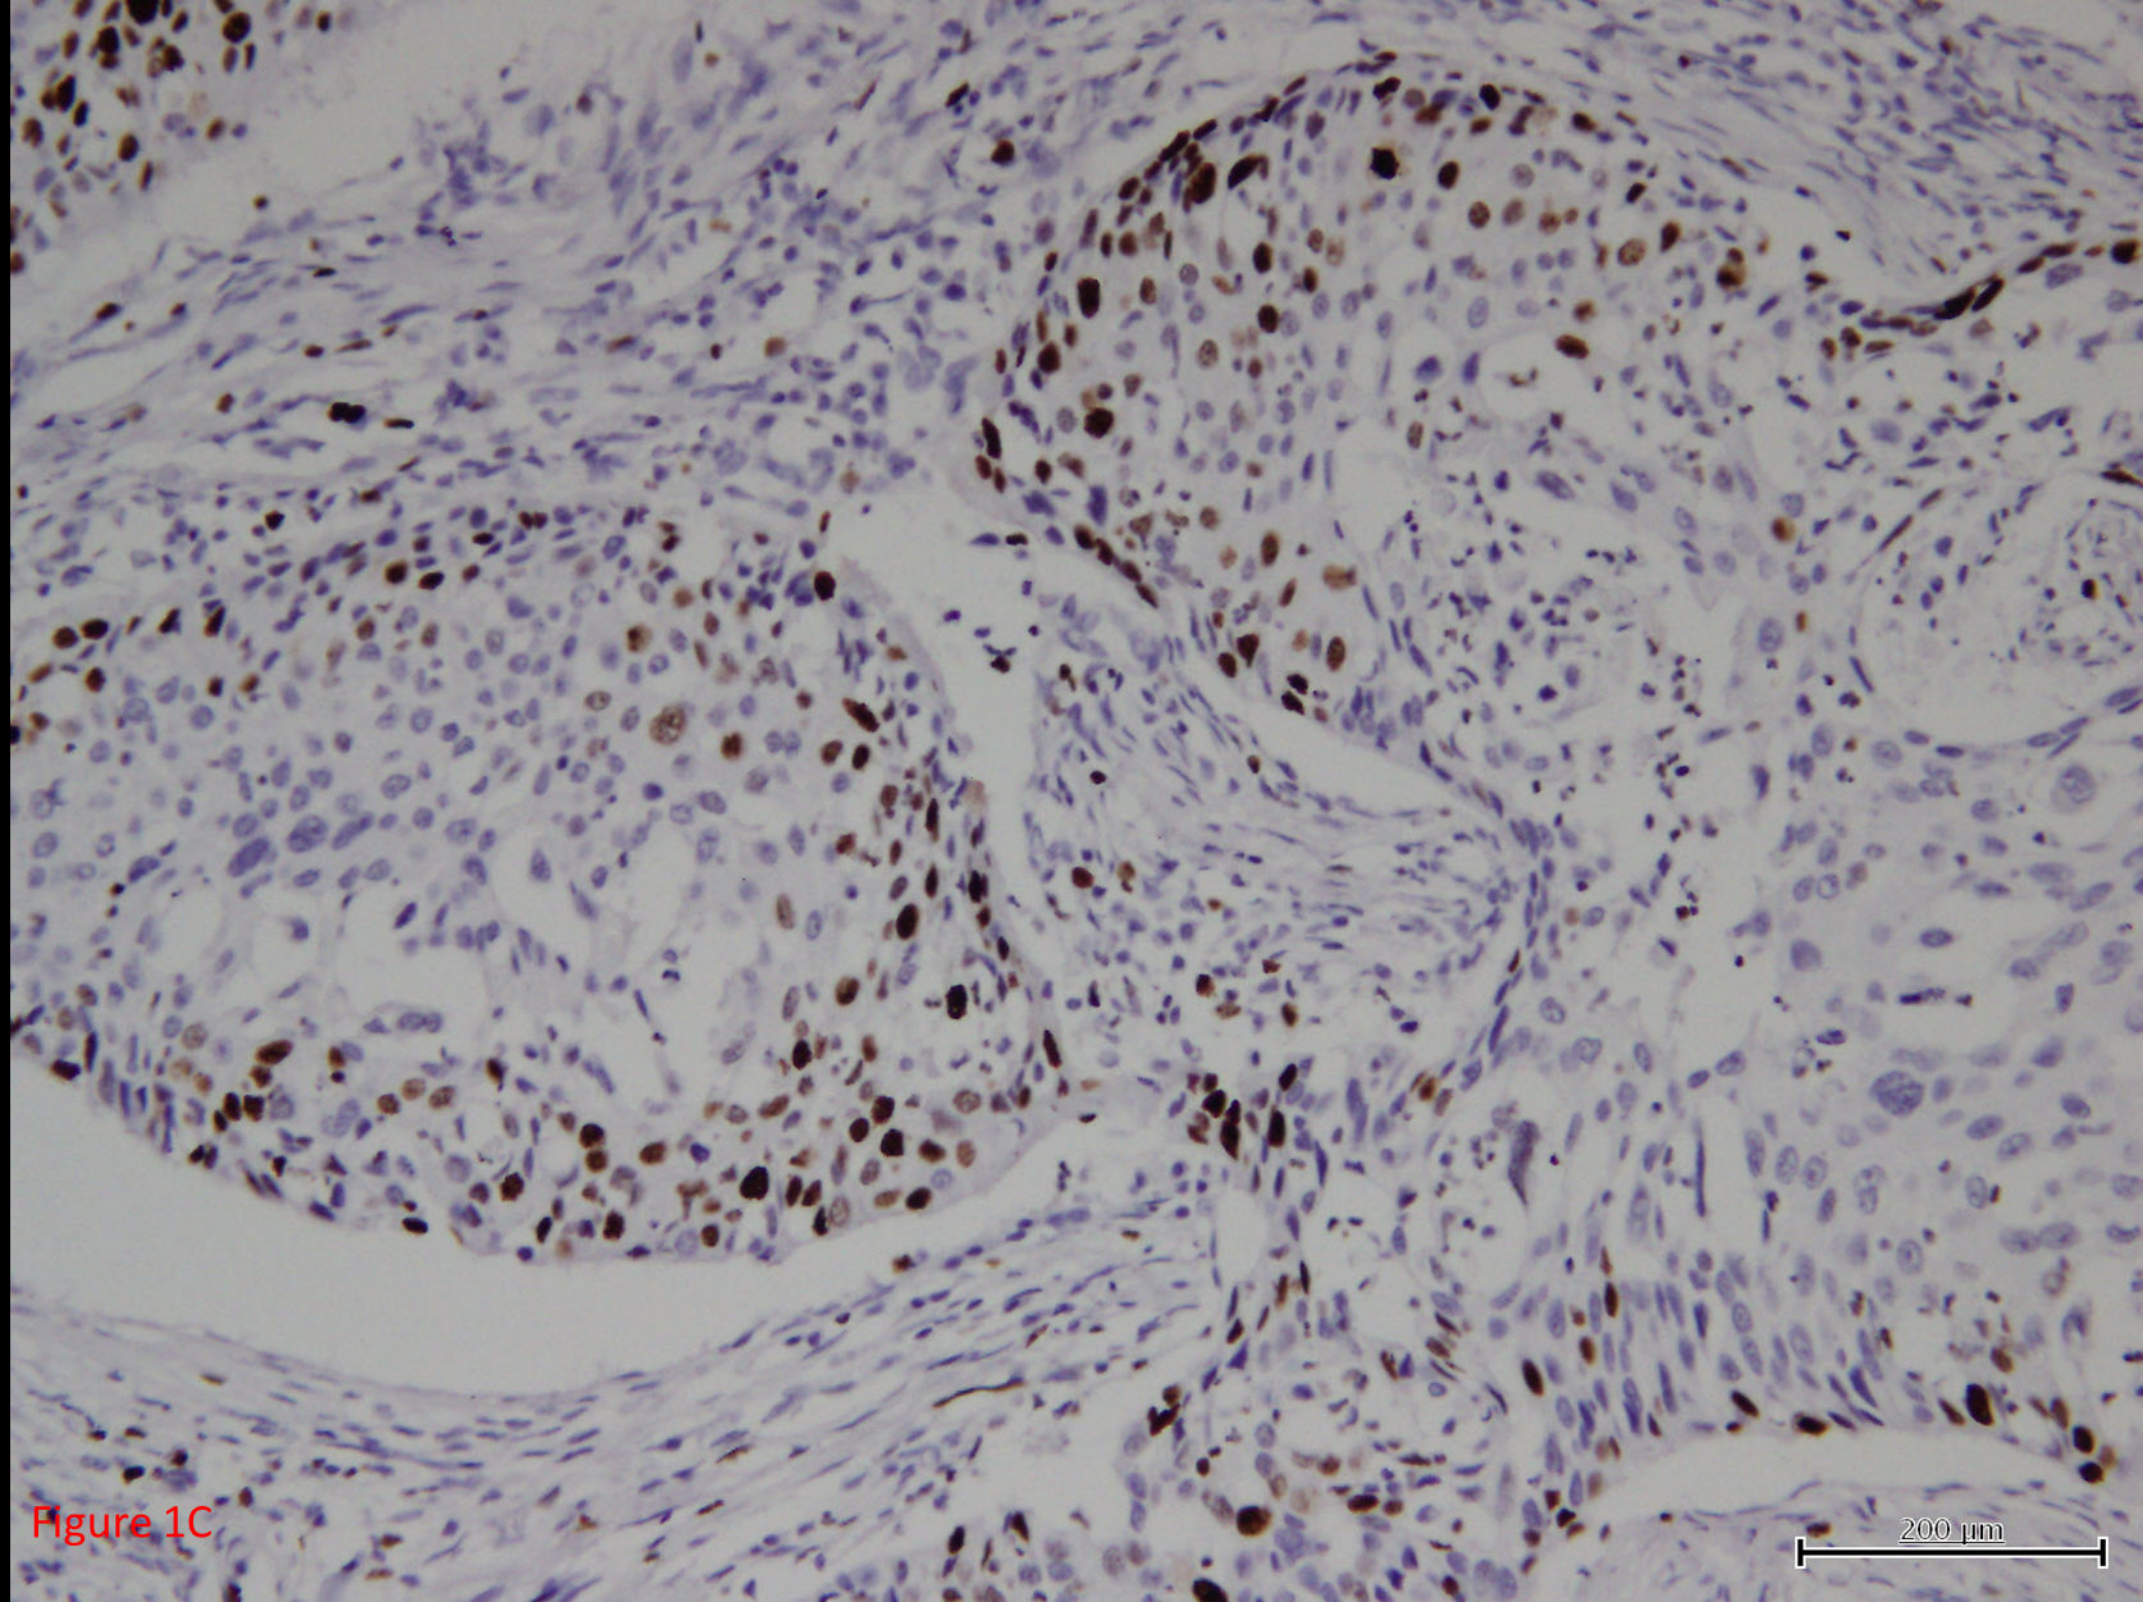

Figure 1C

200  $\mu$ m

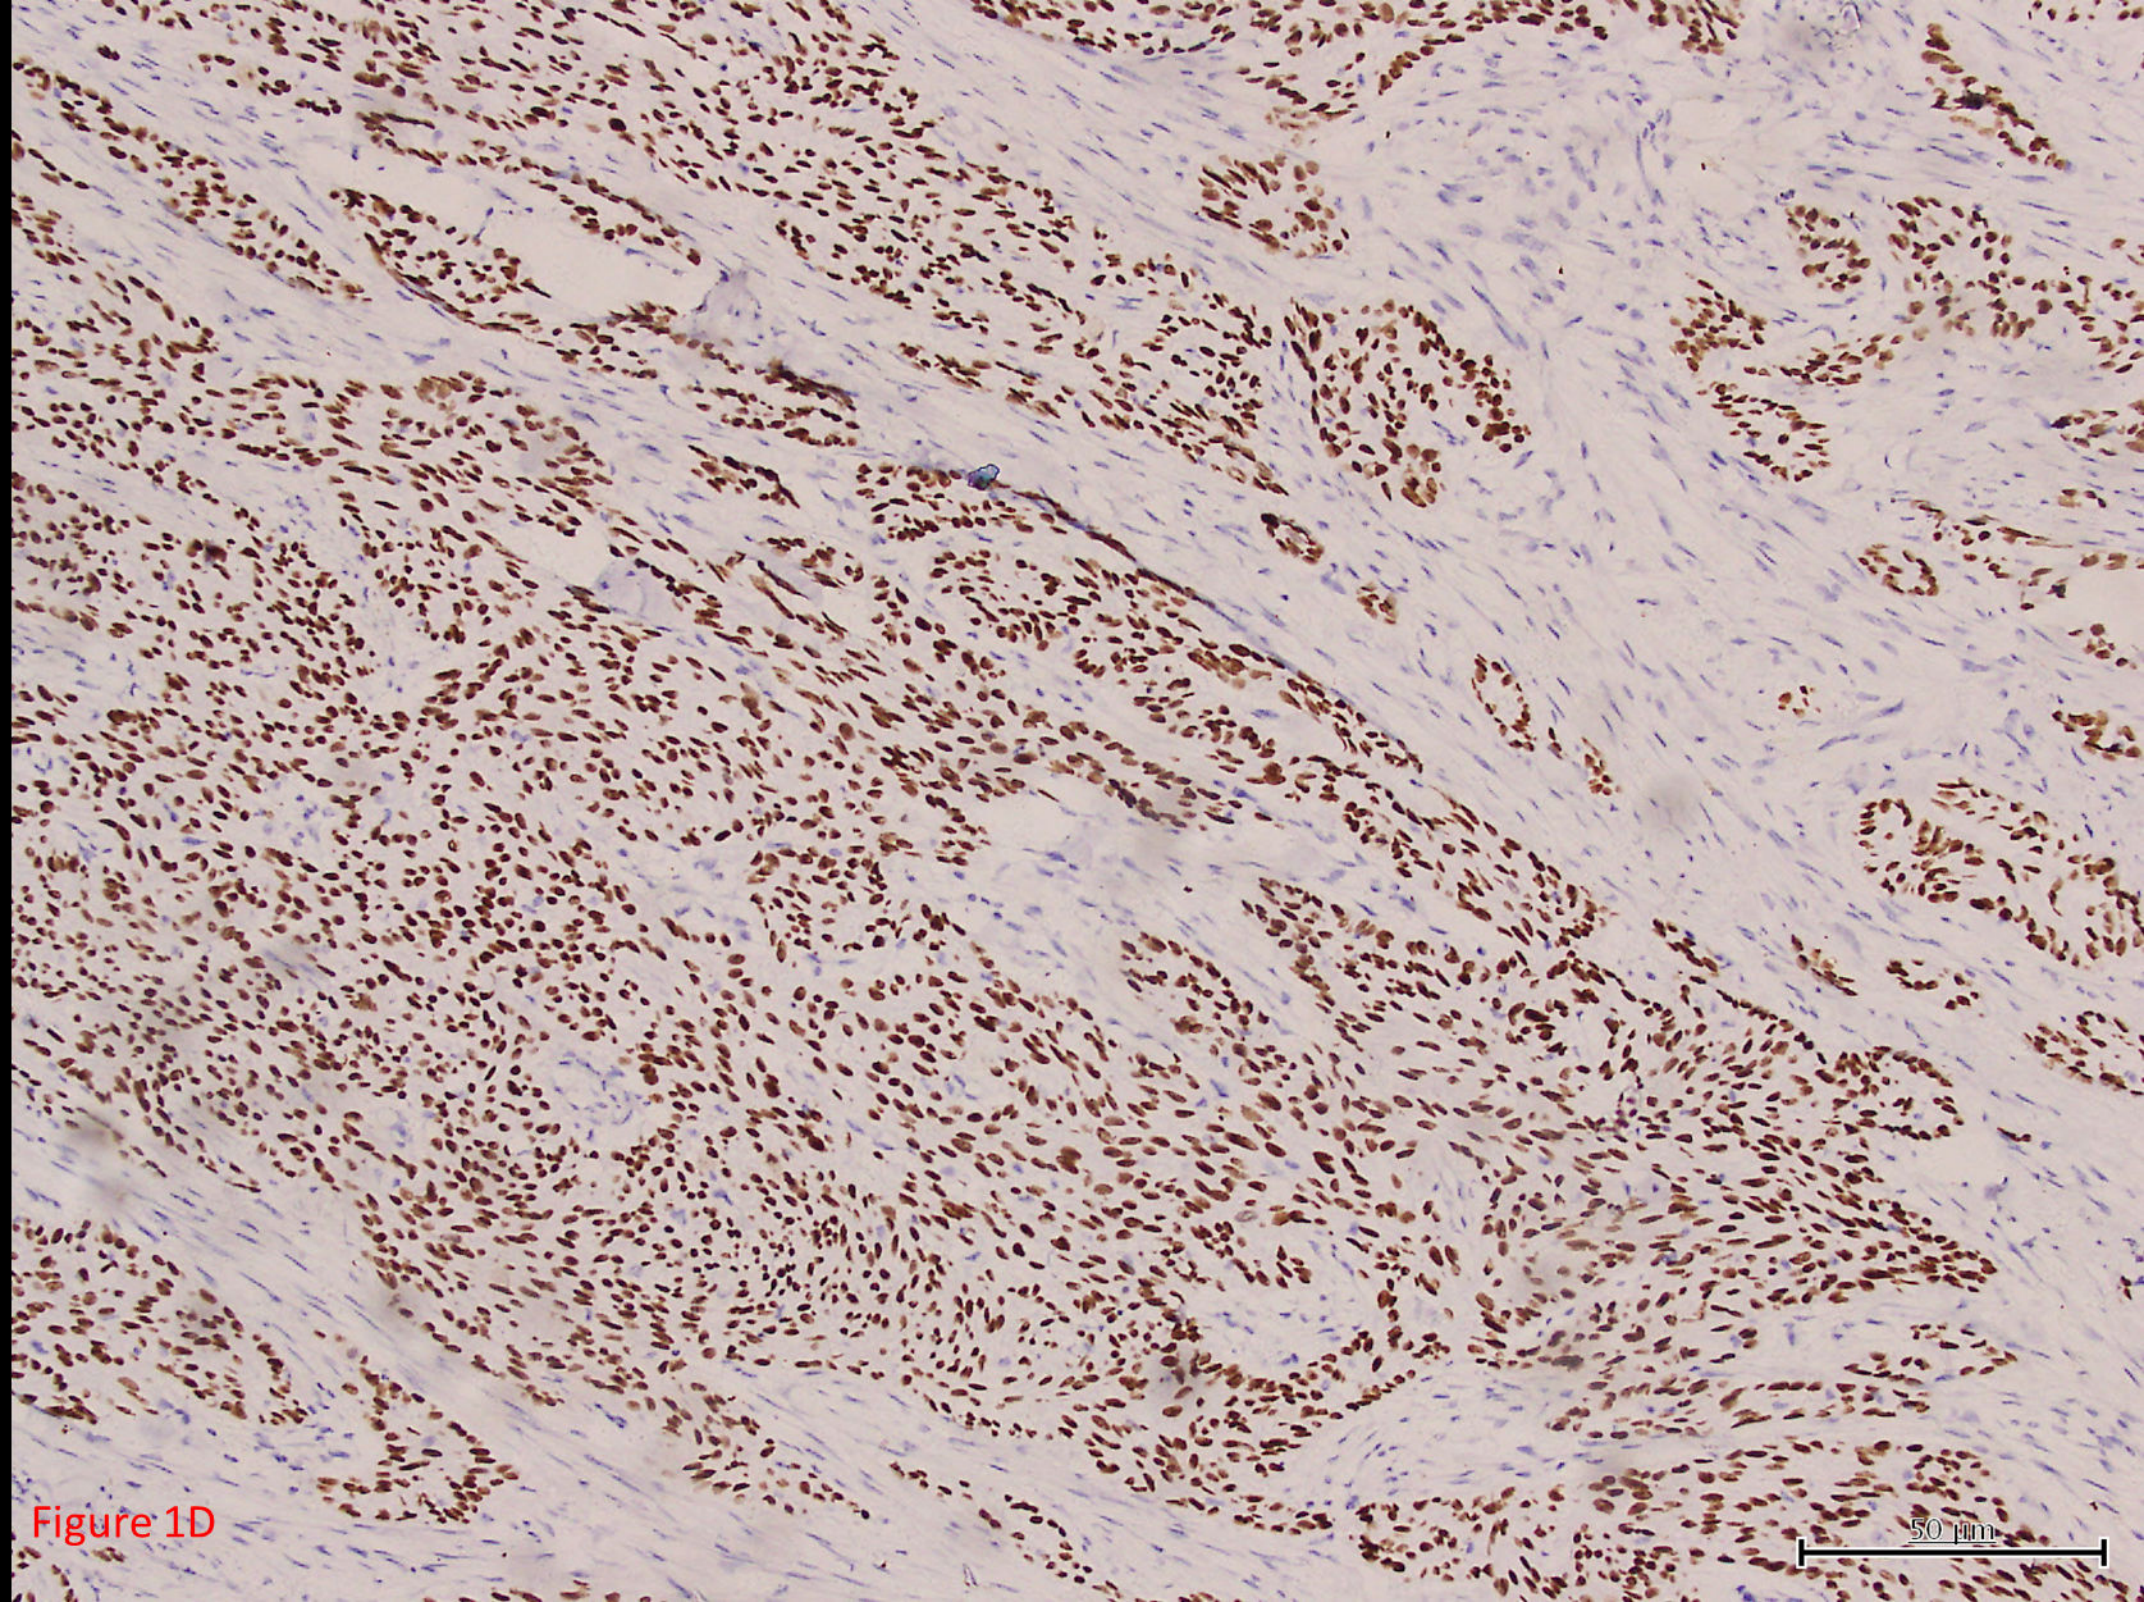

Figure 1D

50  $\mu$ m

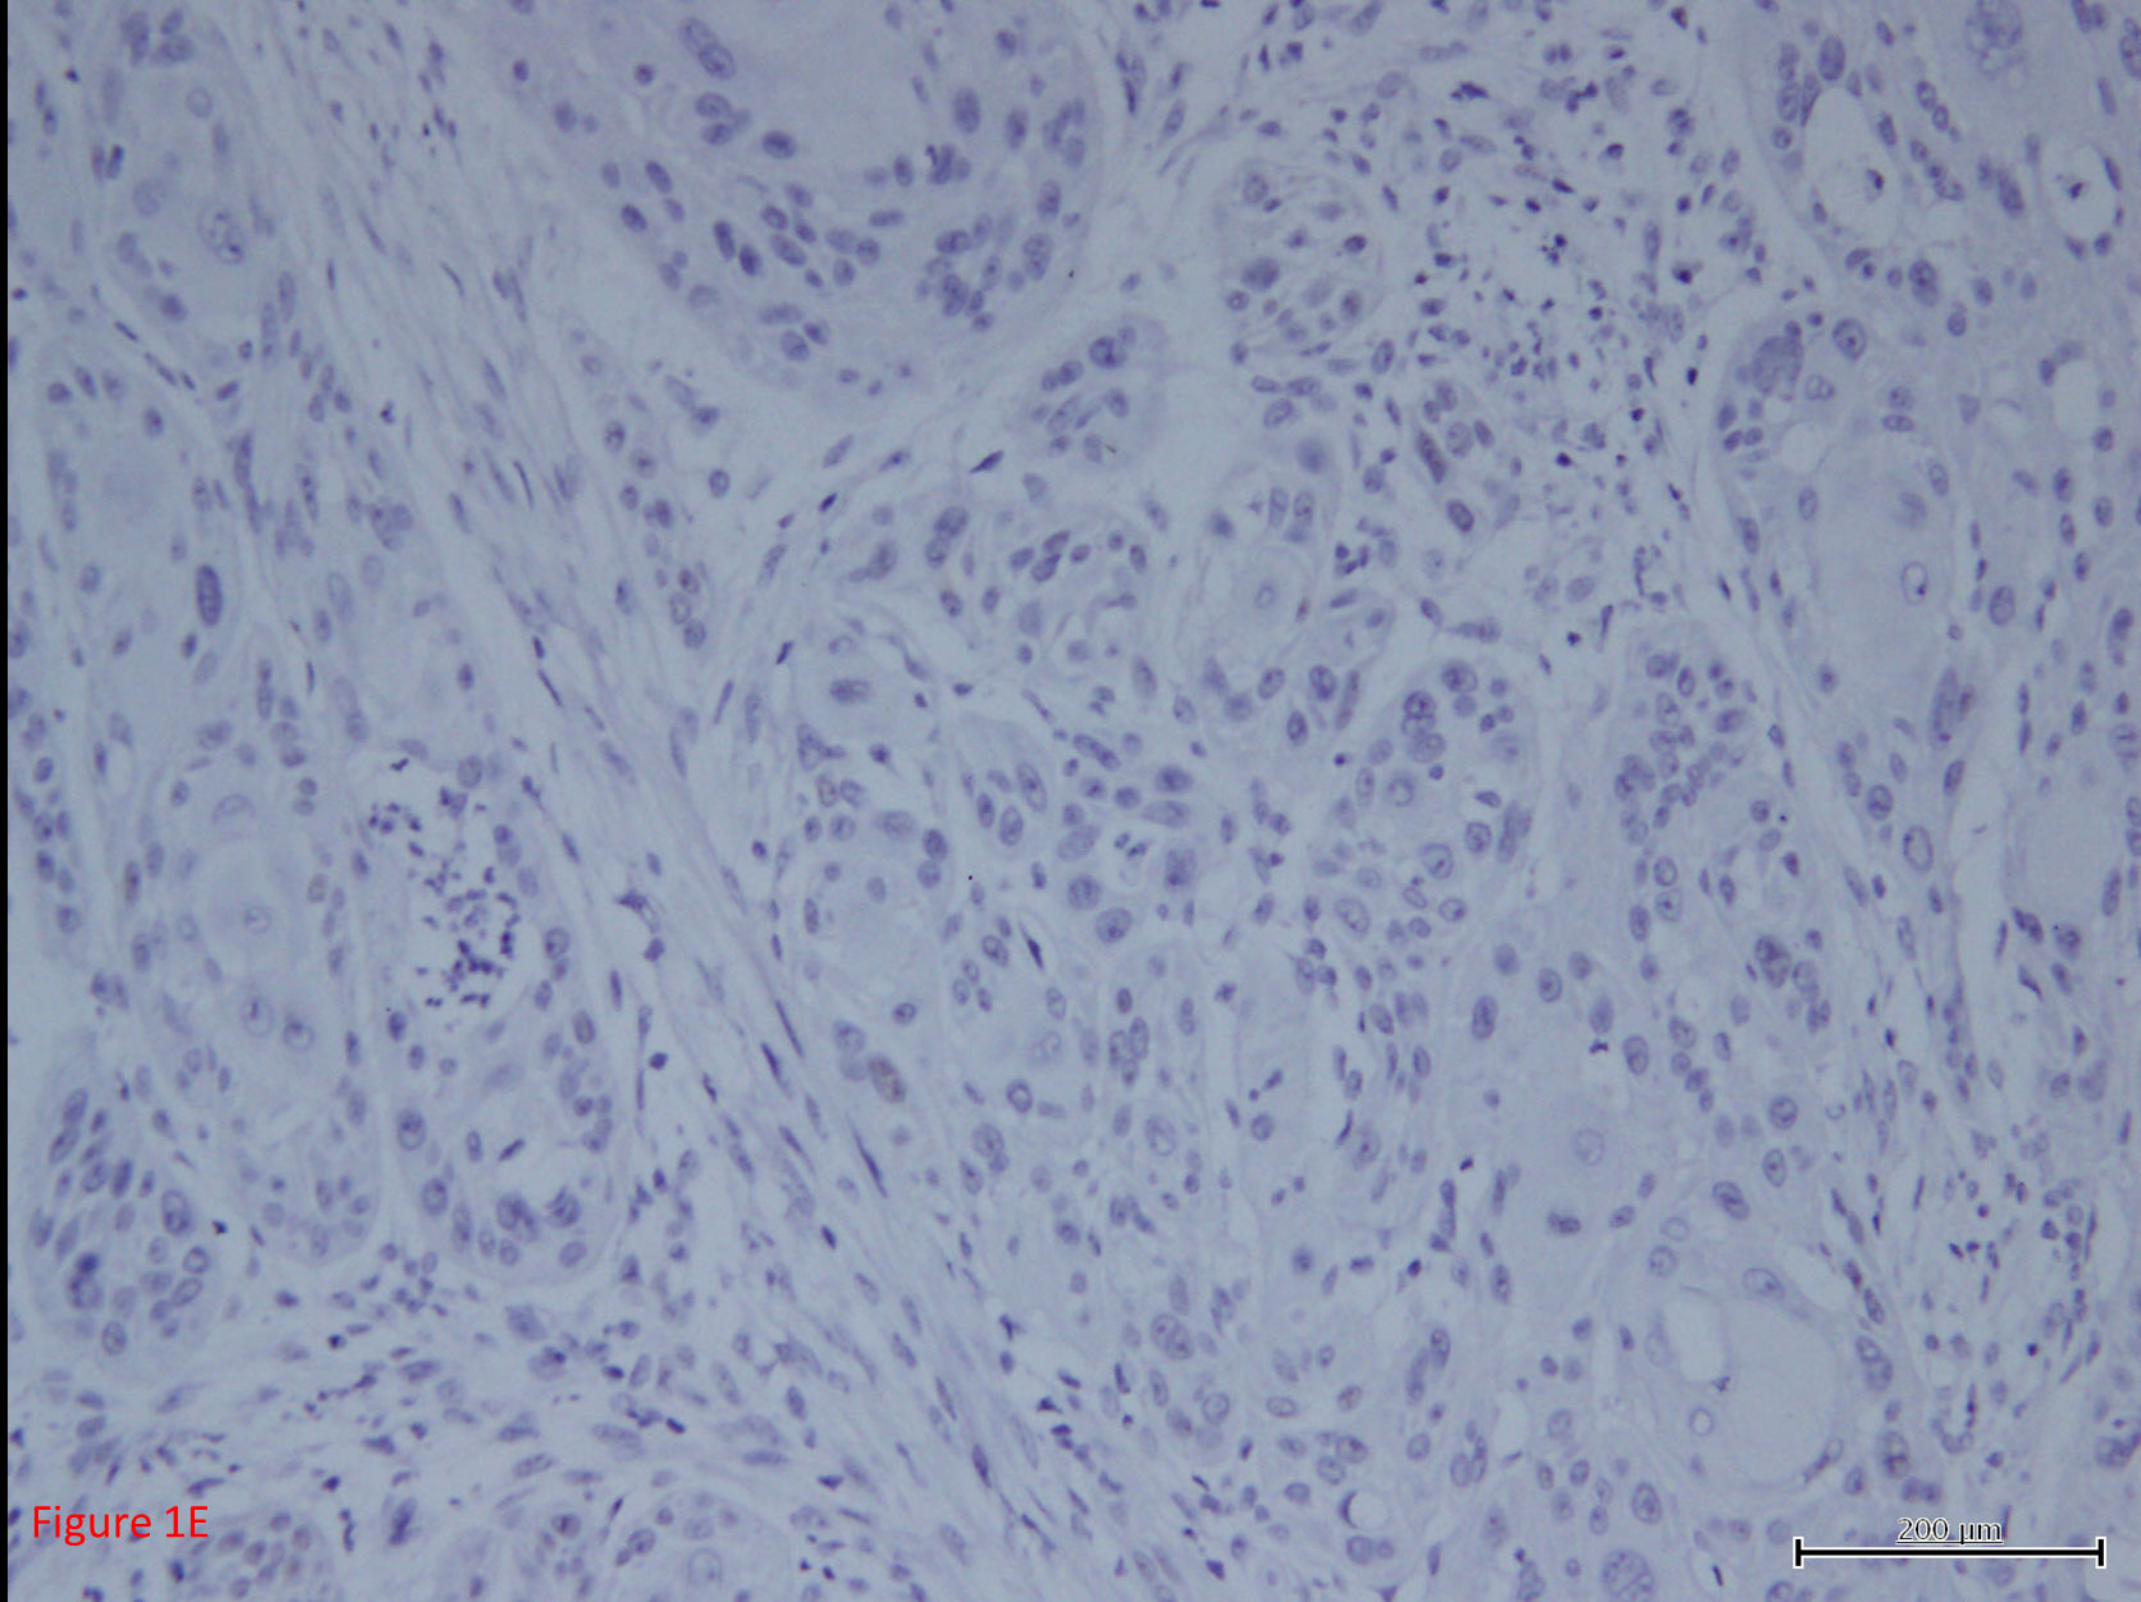

Figure 1E

200  $\mu$ m

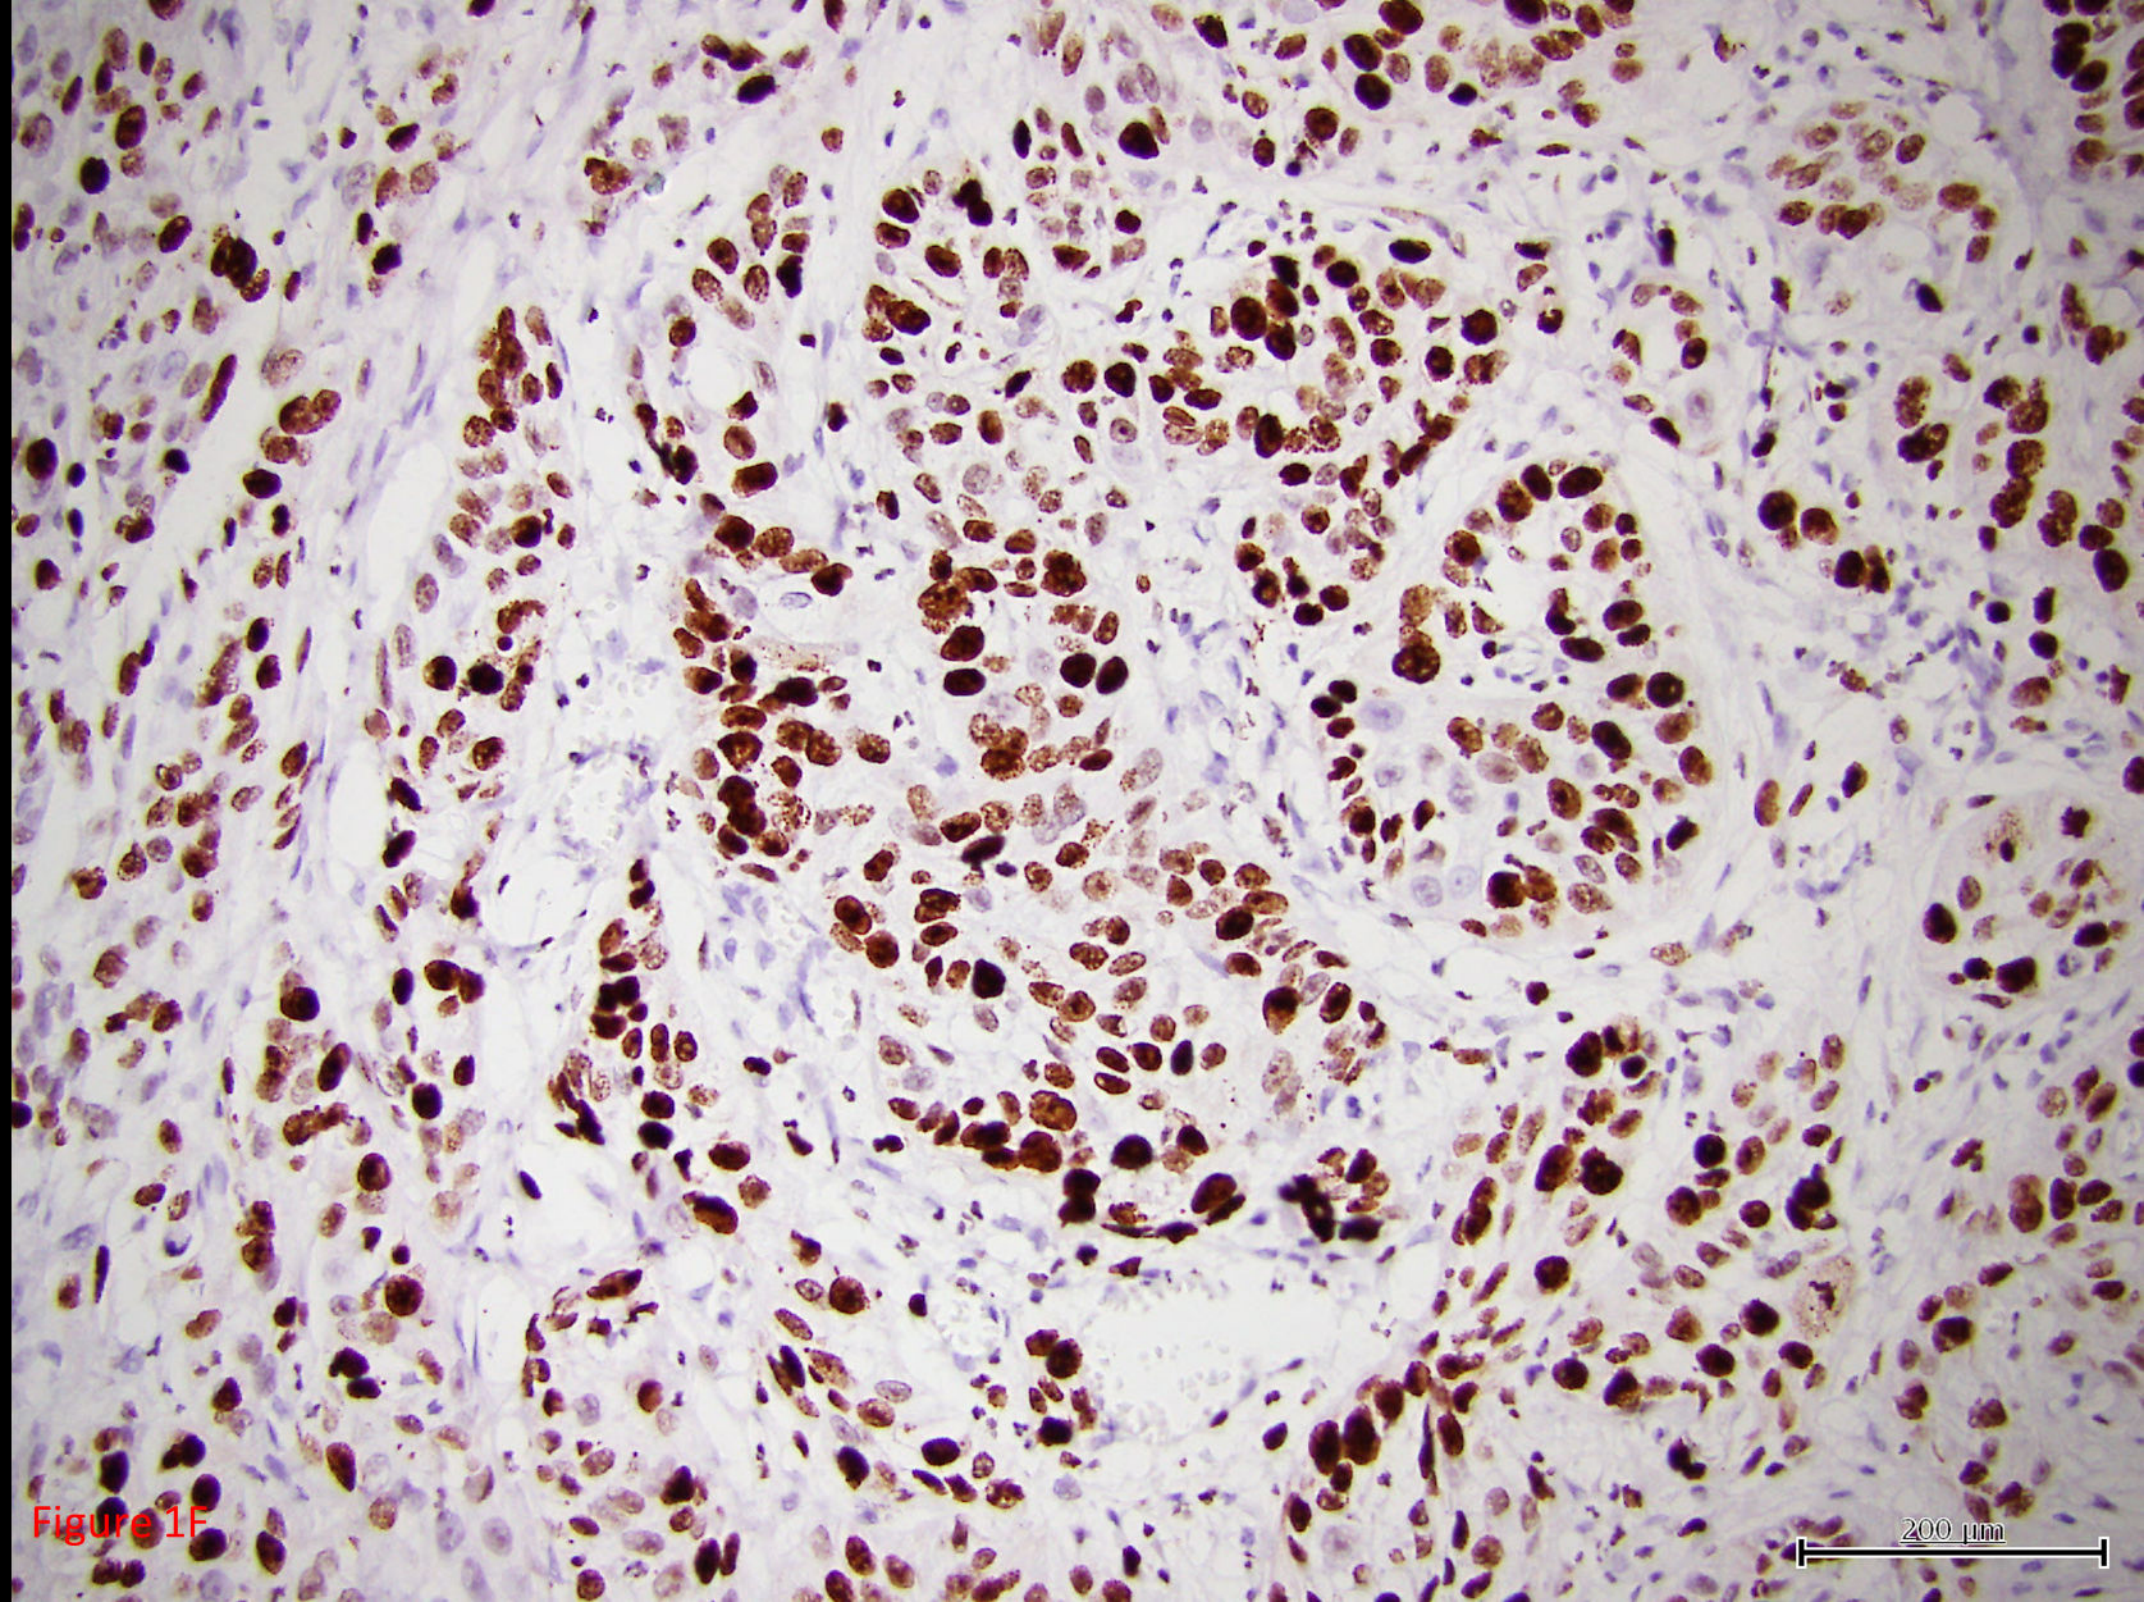

Figure 1F

200  $\mu$ m

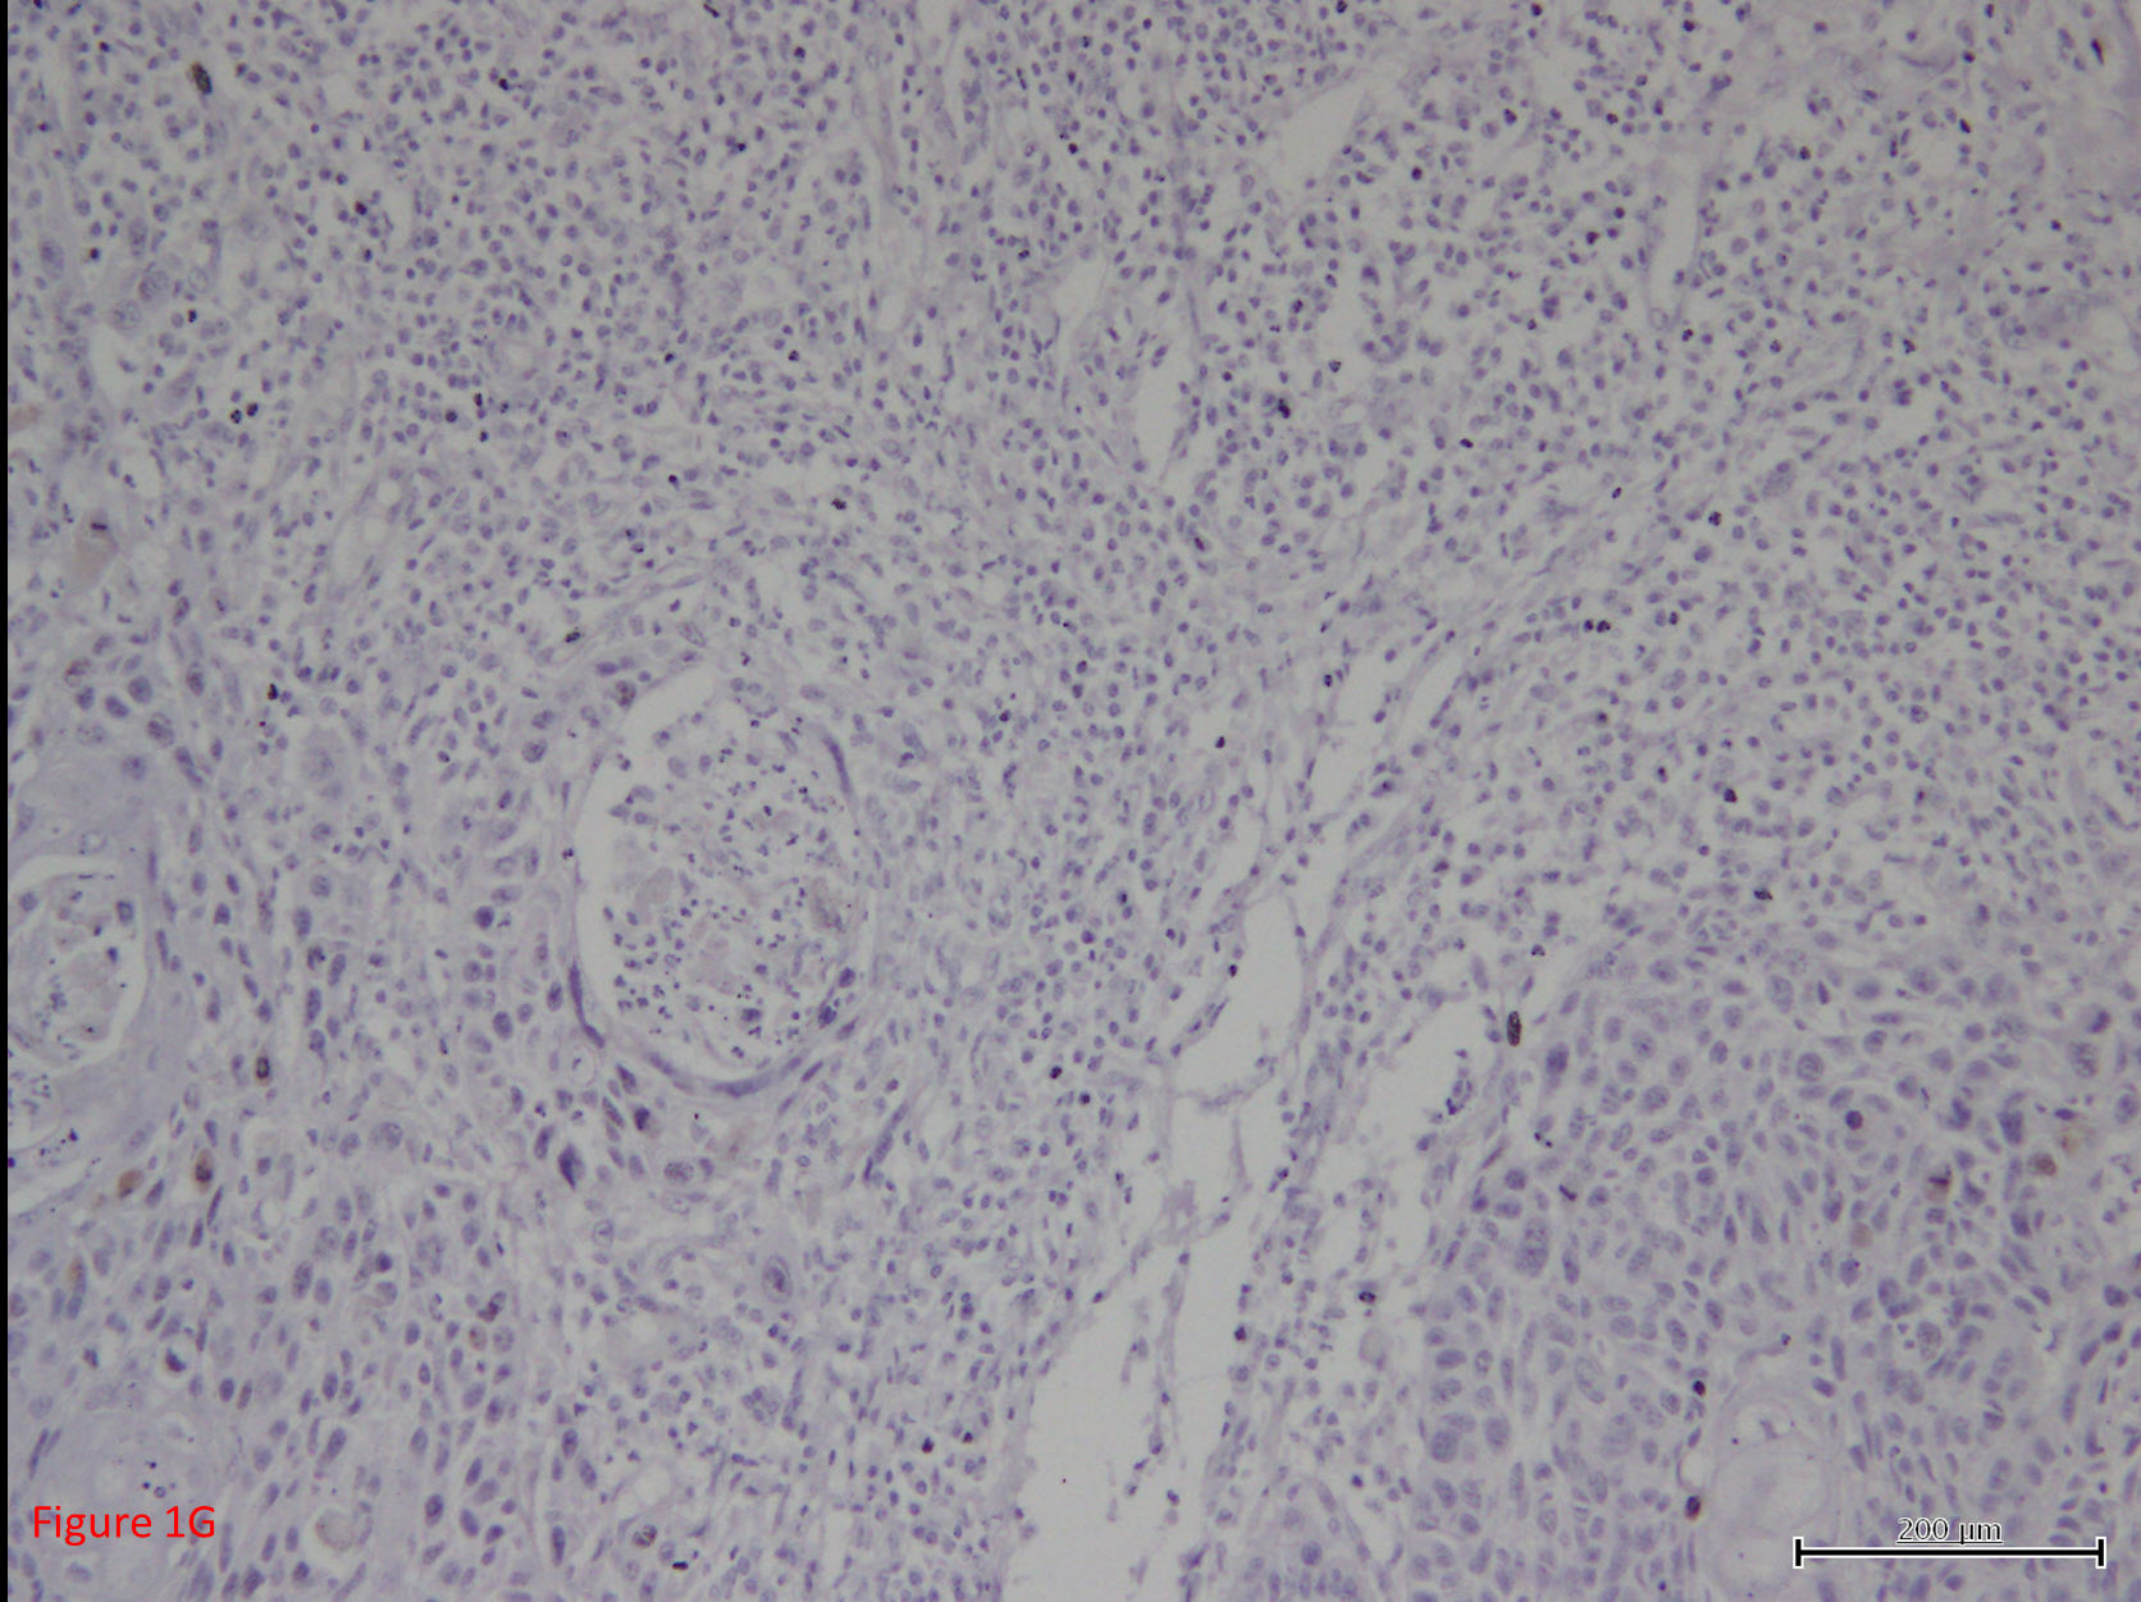

Figure 1G

200  $\mu$ m

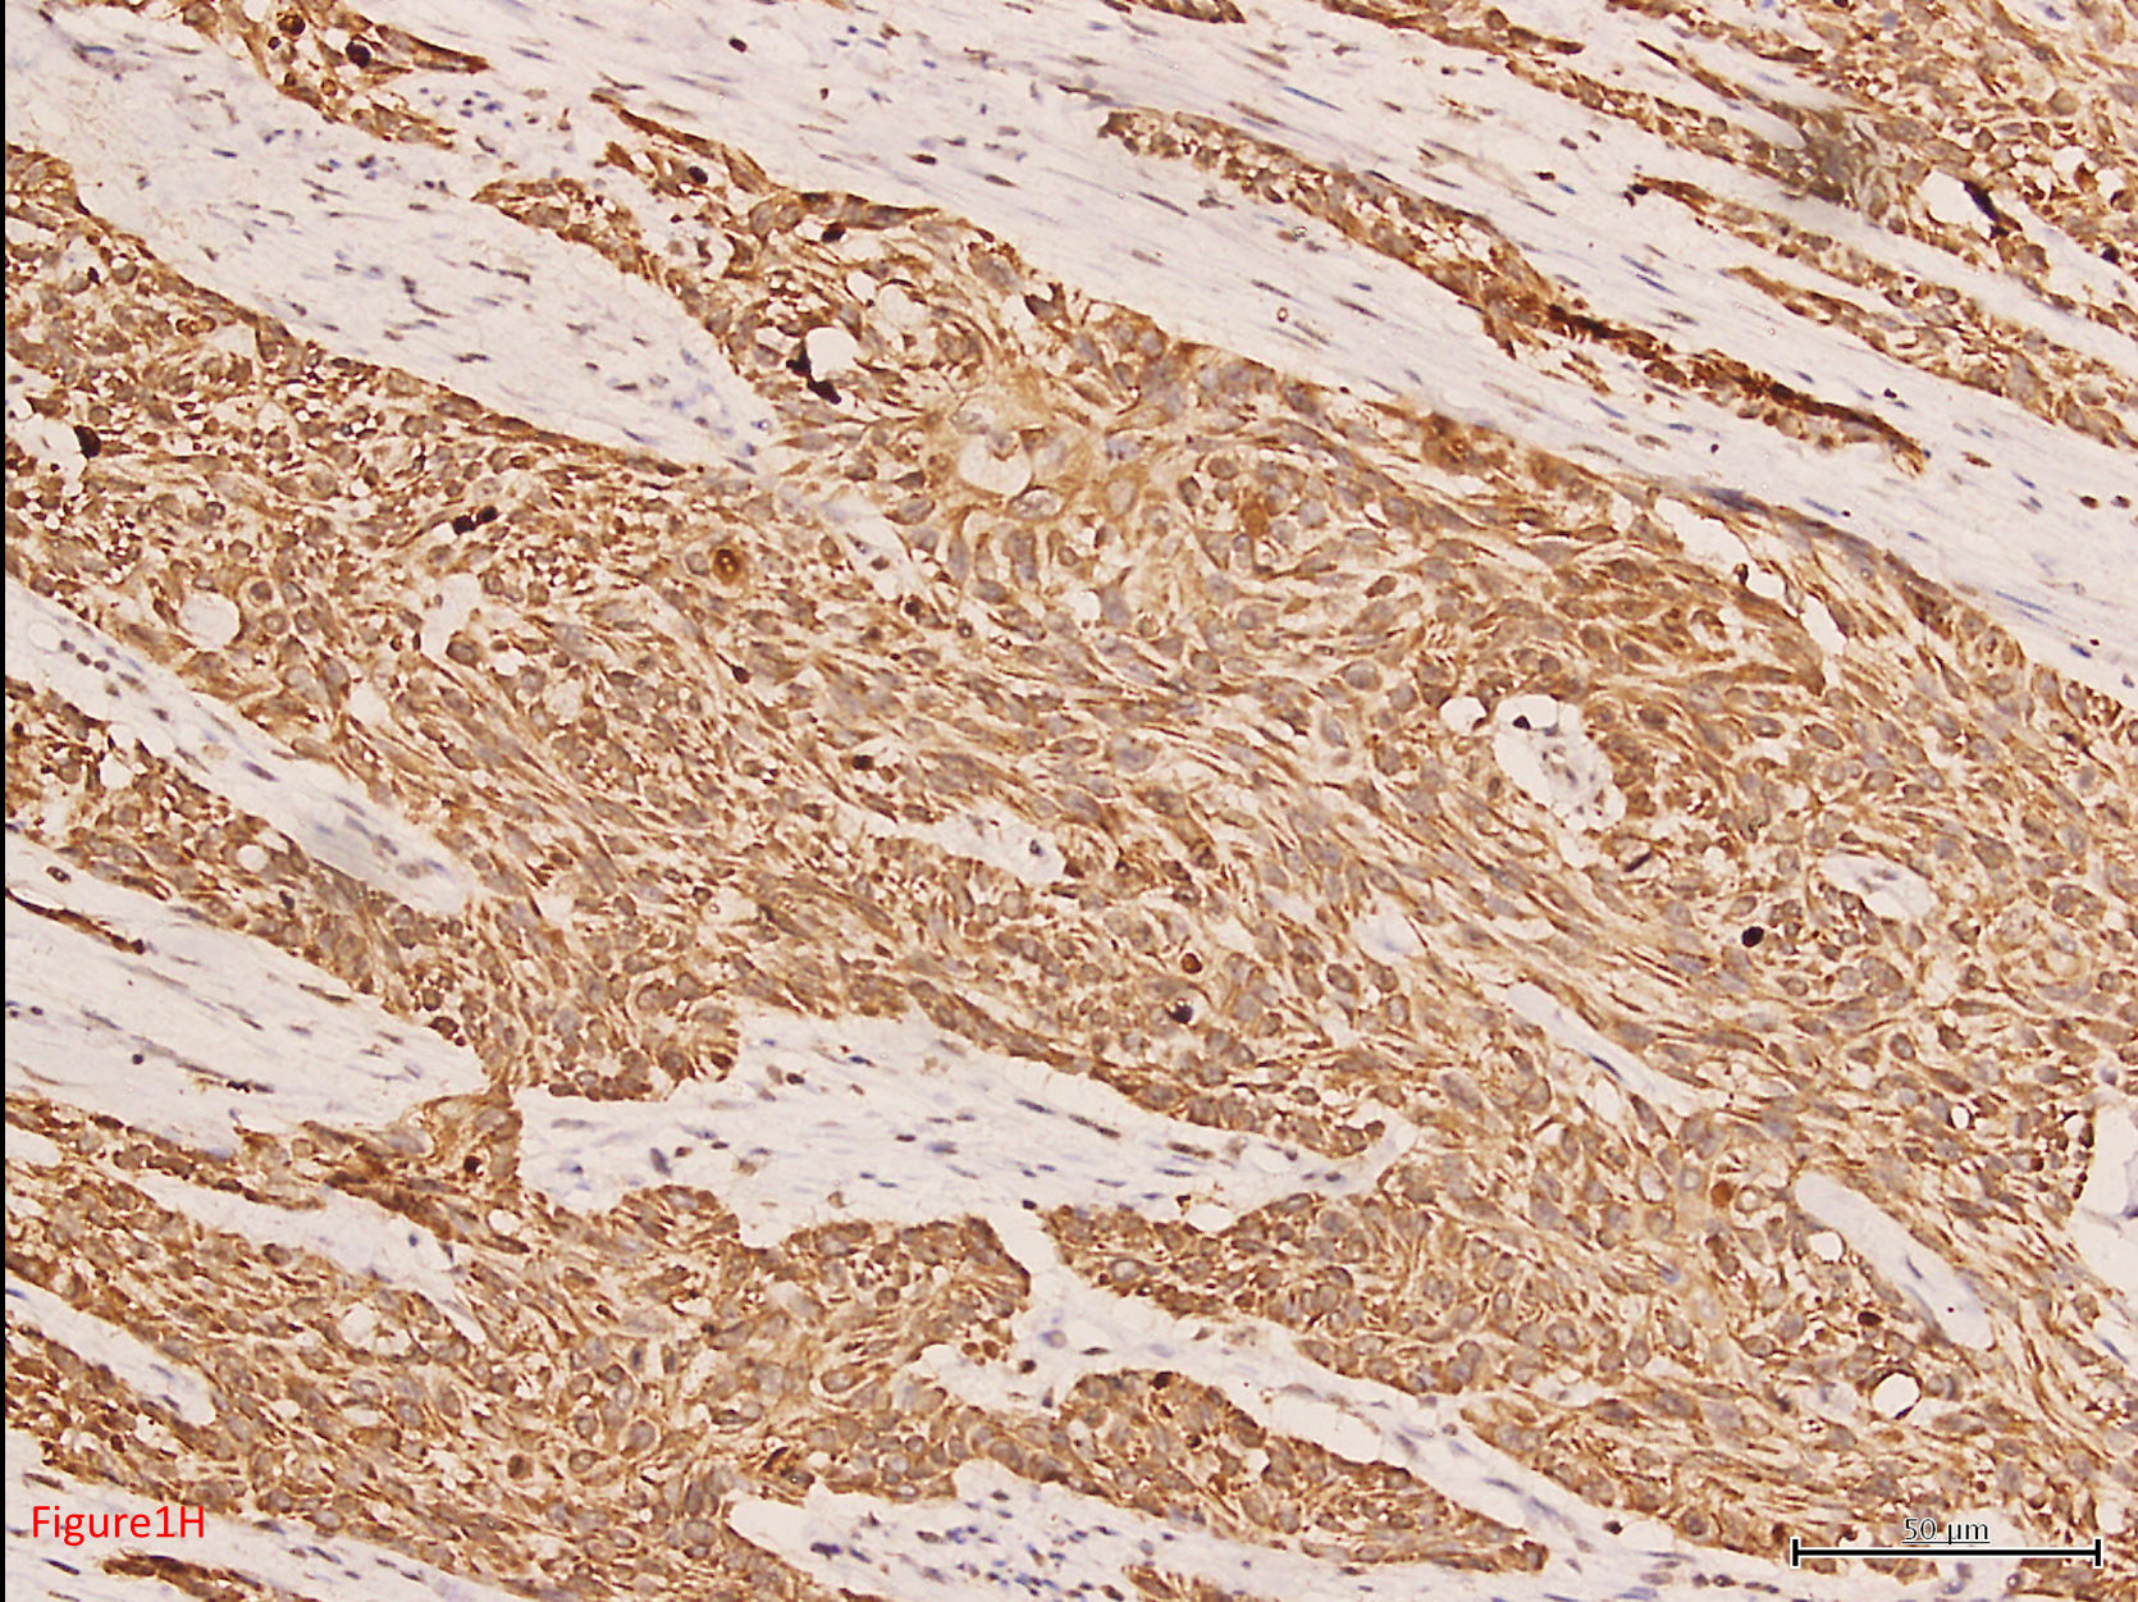

Figure1H

50  $\mu$ m



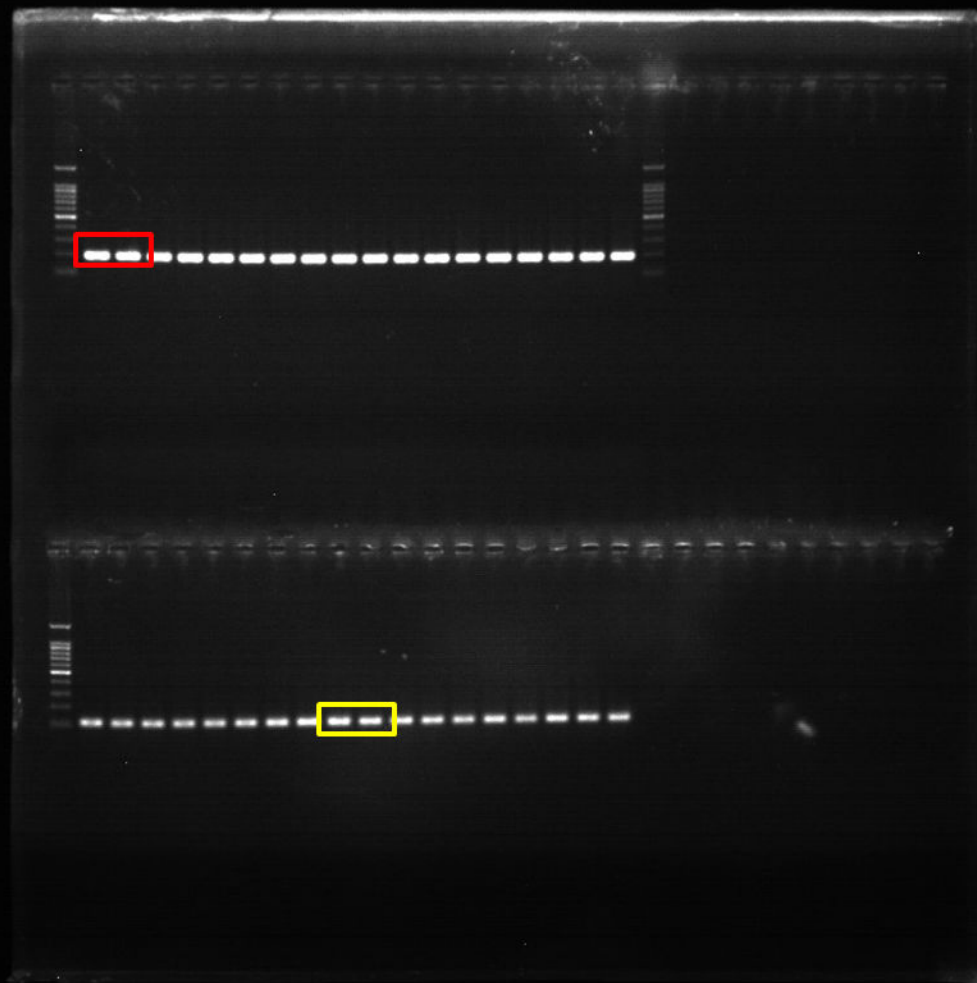

Figure2A(red-GAPDH, yellow-AKR1B10)

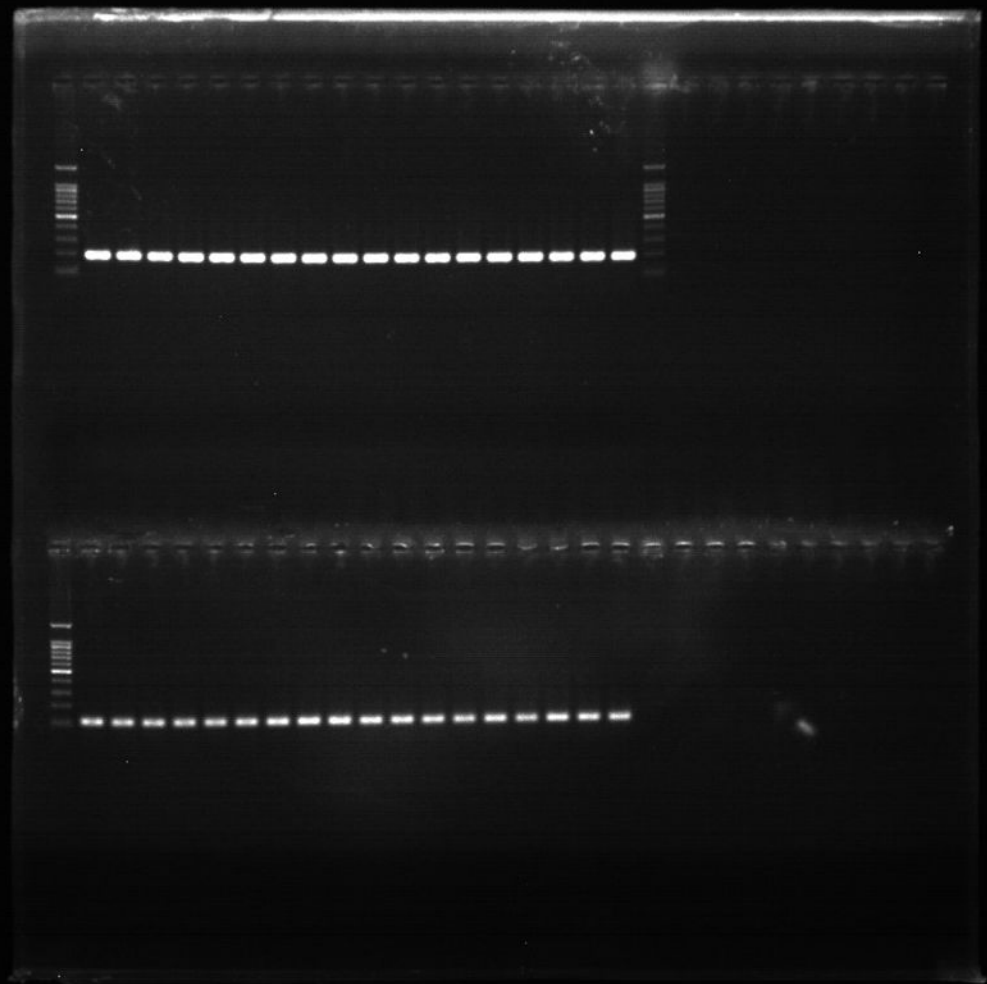

Figure 2A

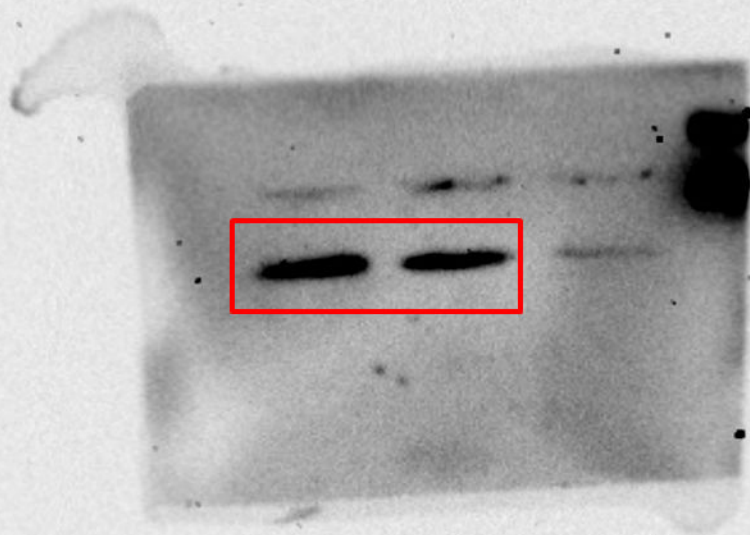

Figure2B(AKR1B10)

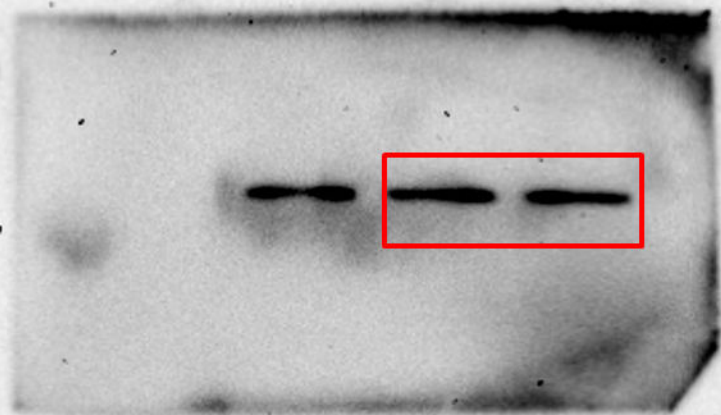

Figure 2B(GAPDH)

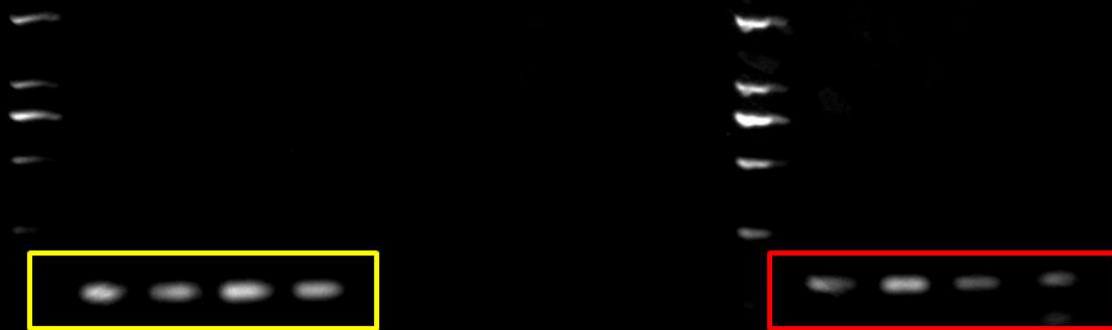

Figure3b(red-AKR1B10,yellow-GAPDH)

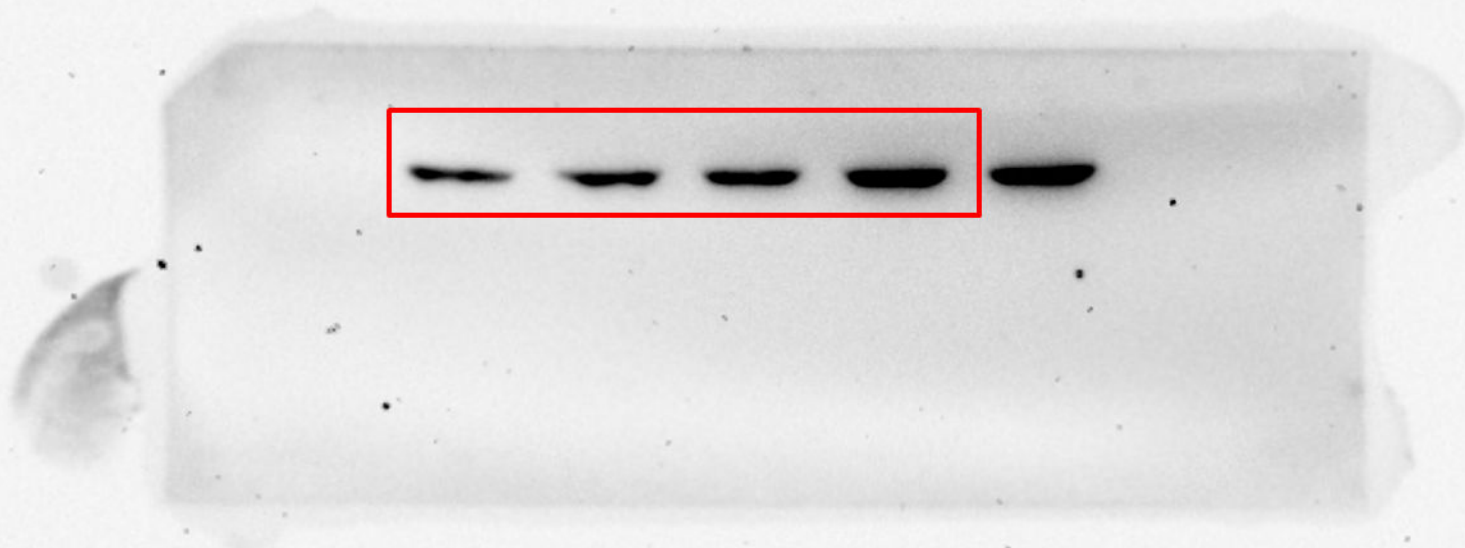

Figure 4A(GAPDH)

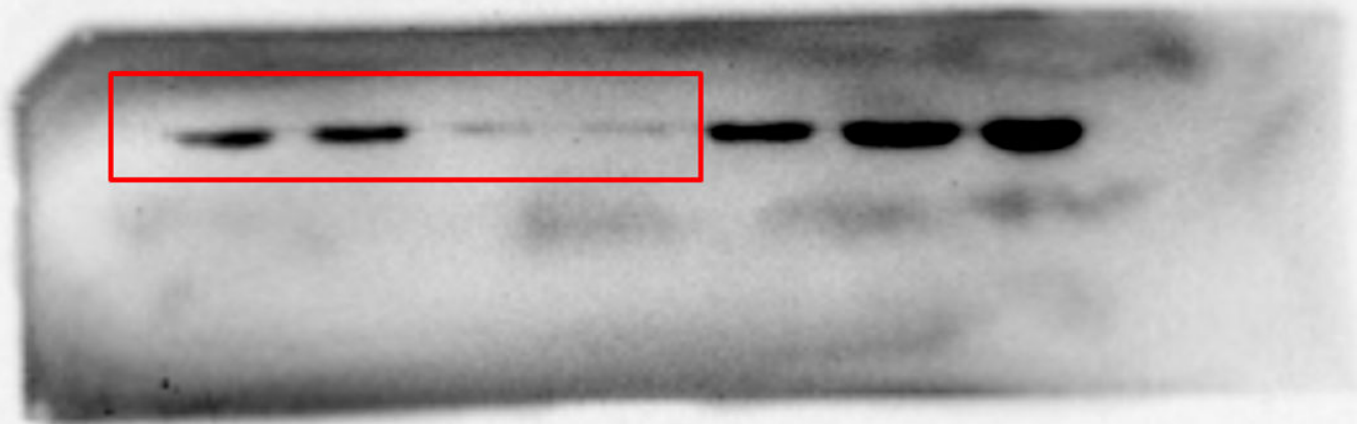

Figure 4A(AKR1B10)

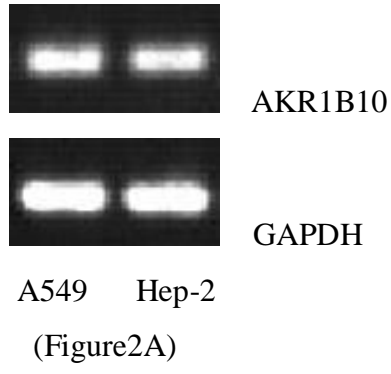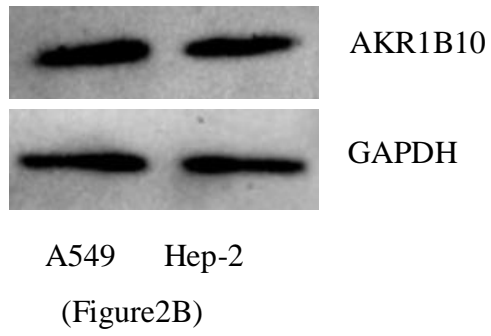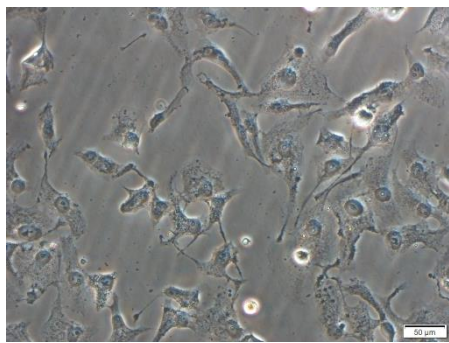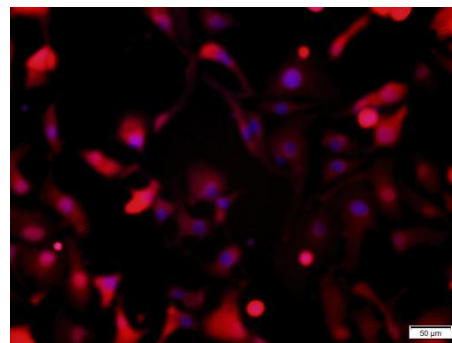

A: Hep-2 (Bright field)

B: Hep-2 (Fluorescence)

(Figure2C)



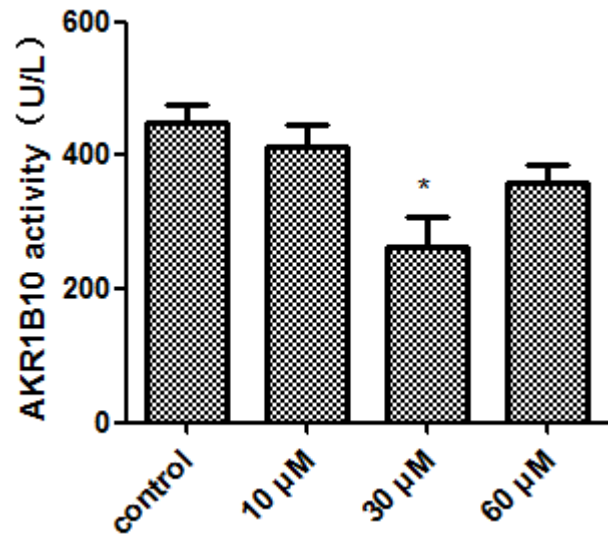

(Figure3A)

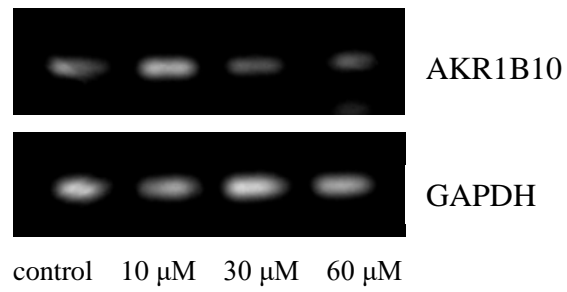

(Figure3B)

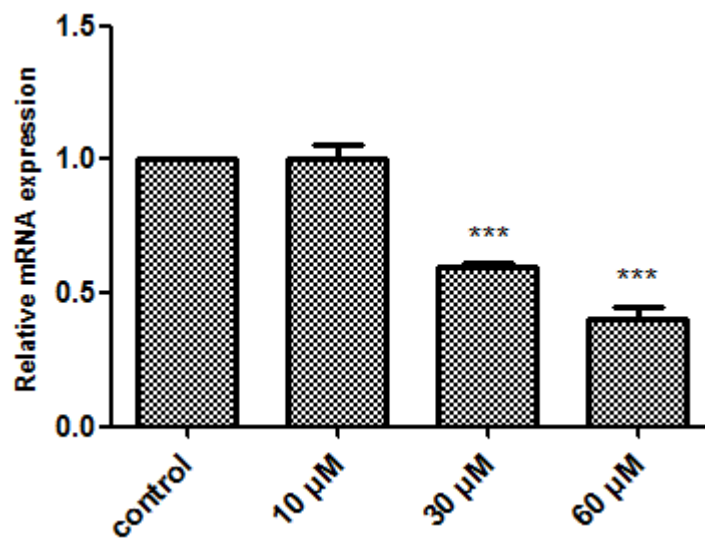

(Figure3C)

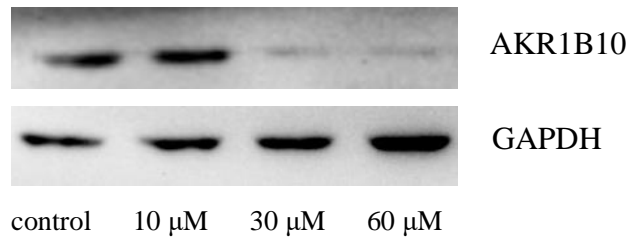

(Figure4A)

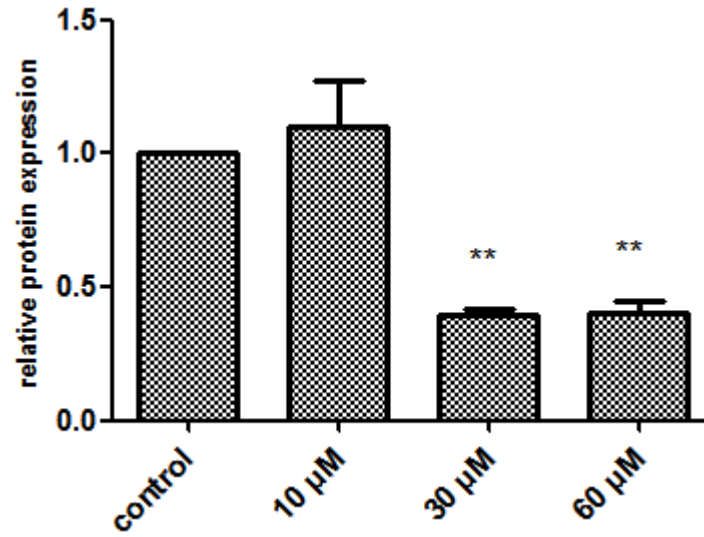

(Figure4B)

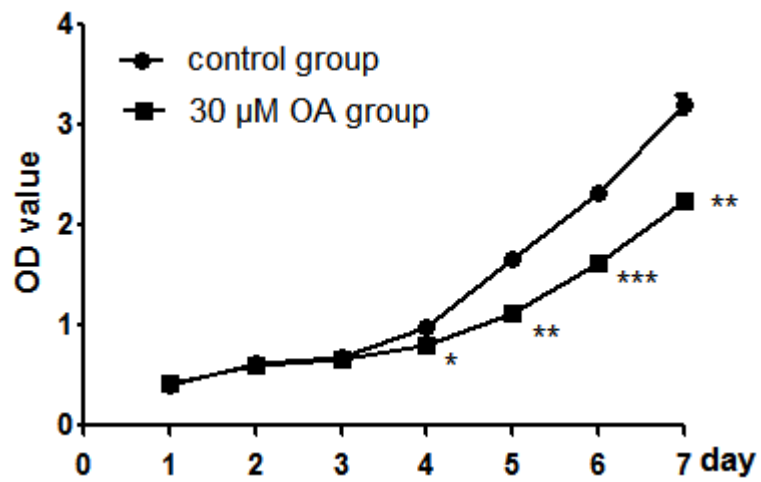

(Figure5A)

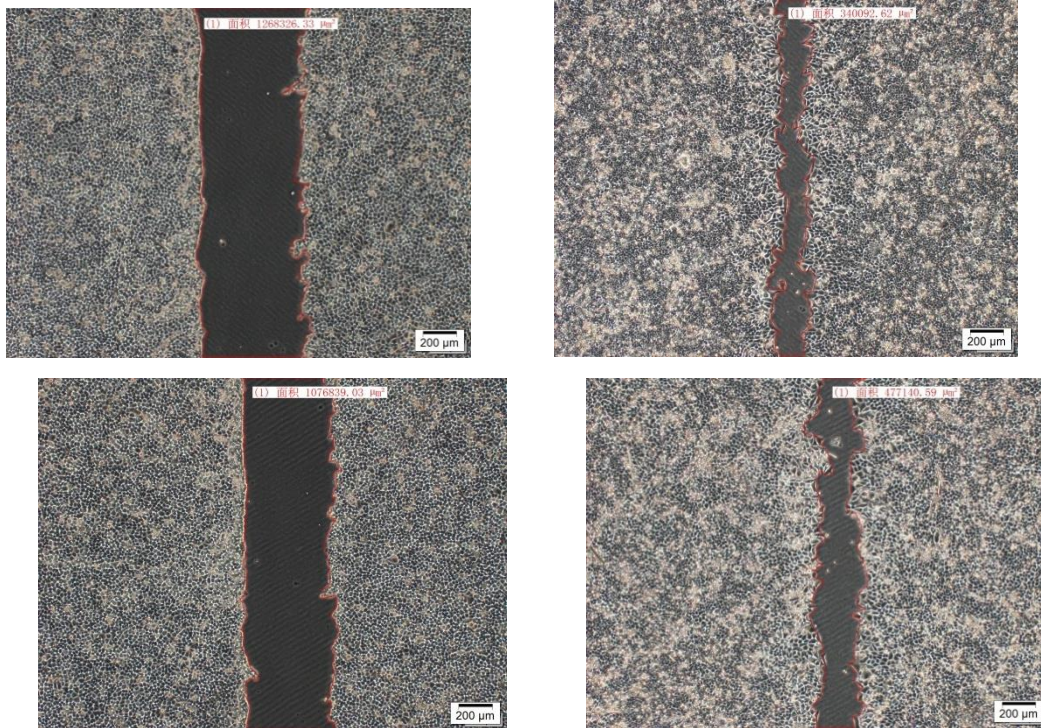

(Figure5B)

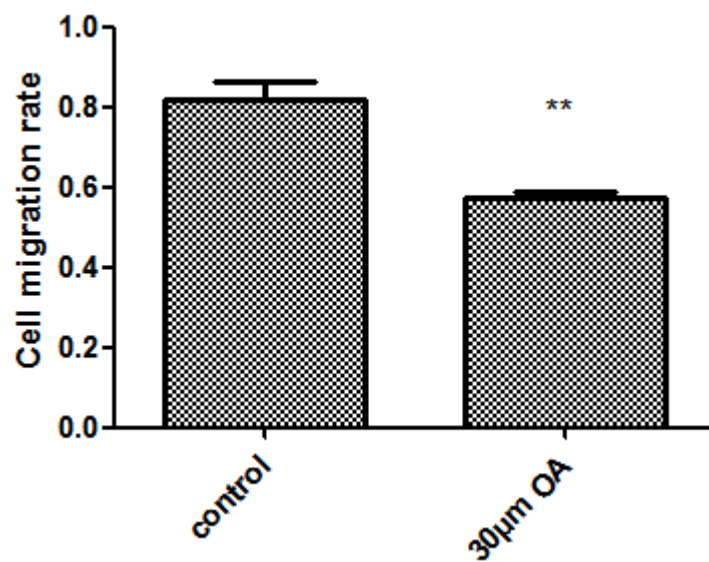

(Figure5C)

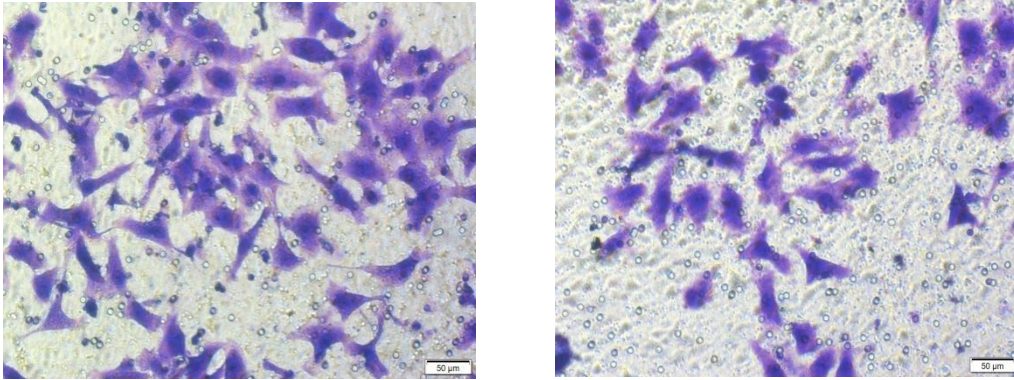

(Figure6A)

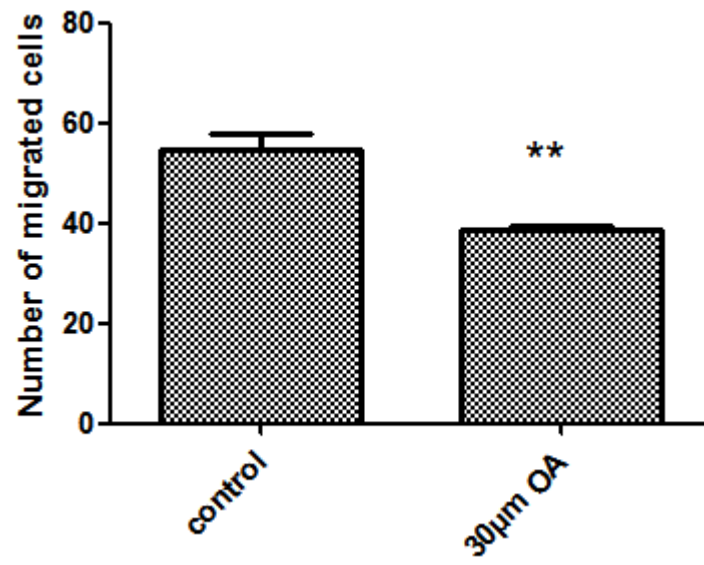

(Figure6B)
